1 **A trans-ancestry genome-wide association study of unexplained**  
2 **chronic ALT elevation as a proxy for nonalcoholic fatty liver disease**  
3 **with histological and radiological validation.**

4 Marijana Vujkovic<sup>1,2,\*</sup>, Shweta Ramdas<sup>3,\*</sup>, Kimberly M. Lorenz<sup>1,3,4</sup>, Xiuqing Guo<sup>5</sup>, Rebecca  
5 Darlay<sup>6</sup>, Heather J. Cordell<sup>6</sup>, Jing He<sup>7</sup>, Yevgeniy Gindin<sup>8</sup>, Chuhan Chung<sup>8</sup>, Rob P Meyers<sup>8</sup>, Carolin  
6 V. Schneider<sup>3</sup>, Joseph Park<sup>3,2</sup>, Kyung M. Lee<sup>9</sup>, Marina Serper<sup>1</sup>, Rotonya M. Carr<sup>2</sup>, David E.  
7 Kaplan<sup>1</sup>, Mary E. Haas<sup>10</sup>, Matthew T. MacLean<sup>3</sup>, Walter R. Witschey<sup>11</sup>, Xiang  
8 Zhu<sup>12,13,14,15</sup>, Catherine Tcheandjieu<sup>12,16</sup>, Rachel L. Kember<sup>17,18</sup>, Henry R. Kranzler<sup>17,18</sup>, Anurag  
9 Verma<sup>1,3</sup>, Ayush Giri<sup>19</sup>, Derek M. Klarin<sup>20,21,22</sup>, Yan V. Sun<sup>23,24</sup>, Jie Huang<sup>25</sup>, Jennifer  
10 Huffman<sup>21</sup>, Kate Townsend Creasy<sup>3</sup>, Nicholas J. Hand<sup>3</sup>, Ching-Ti Liu<sup>26</sup>, Michelle T. Long<sup>27</sup>, Jie  
11 Yao<sup>5</sup>, Matthew Budoff<sup>28</sup>, Jingyi Tan<sup>5</sup>, Xiaohui Li<sup>5</sup>, Henry J. Lin<sup>5</sup>, Yii-Der Ida Chen<sup>5</sup>, Kent D.  
12 Taylor<sup>5</sup>, Ruey-Kang Chang<sup>5</sup>, Ronald M. Krauss<sup>29</sup>, Silvia Vilarinho<sup>30</sup>, Joseph Brancale<sup>30</sup>, Jonas B.  
13 Nielsen<sup>31</sup>, Adam E. Locke<sup>31</sup>, Marcus B. Jones<sup>31</sup>, Niek Verweij<sup>31</sup>, Aris Baras<sup>31</sup>, K. Rajender  
14 Reddy<sup>2</sup>, Brent A. Neuschwander-Tetri<sup>32</sup>, Jeffrey B. Schwimmer<sup>33</sup>, Arun J. Sanyal<sup>34</sup>, Naga  
15 Chalasani<sup>35</sup>, Katherine A. Ryan<sup>36</sup>, Braxton D. Mitchell<sup>37</sup>, Dipender Gill<sup>38</sup>, Andrew D.  
16 Wells<sup>39,40</sup>, Elisabetta Manduchi<sup>41</sup>, Yedidya Saiman<sup>42</sup>, Nadim Mahmud<sup>42</sup>, Donald R.  
17 Miller<sup>43,44</sup>, Peter D. Reaven<sup>45,46</sup>, Lawrence S. Phillips<sup>23,47</sup>, Sumitra Muralidhar<sup>48</sup>, Scott L.  
18 DuVall<sup>9,49</sup>, Jennifer S. Lee<sup>12,16</sup>, Themistocles L. Assimes<sup>12,16</sup>, Saiju Pyarajan<sup>21,50,51</sup>, Kelly  
19 Cho<sup>21,50</sup>, Todd L. Edwards<sup>52,53</sup>, Scott M. Damrauer<sup>1,54</sup>, Peter W. Wilson<sup>23,55</sup>, J. Michael  
20 Gaziano<sup>21,50</sup>, Christopher J. O'Donnell<sup>21,50,51</sup>, Amit V. Khera<sup>20,22,51</sup>, Struan F.A.  
21 Grant<sup>56,40</sup>, Christopher D. Brown<sup>3</sup>, Philip S. Tsao<sup>12,16</sup>, Danish Saleheen<sup>57,58,59</sup>, Luca A. Lotta<sup>31</sup>, Lisa

22 Bastarache<sup>7</sup>, Quentin M. Anstee<sup>60,61</sup>, Ann K. Daly<sup>60</sup>, James B. Meigs<sup>22,51,62</sup>, Jerome I. Rotter<sup>5</sup>, Julie  
23 A. Lynch<sup>9,49,63</sup>, Regeneron Genetics Center, DiscovEHR Collaboration, EPoS Consortium  
24 Investigators, VA Million Veteran Program, Daniel J. Rader<sup>2,3,\*</sup>, Benjamin F.  
25 Voight<sup>1,3,4,64,\*</sup>, Kyong-Mi Chang<sup>1,4,\*</sup>

26

27 \*These authors contributed equally

28

## 29 Affiliations

30 <sup>1</sup>Corporal Michael J. Crescenz VA Medical Center, Philadelphia, PA, USA, <sup>2</sup>Department of  
31 Medicine, University of Pennsylvania Perelman School of Medicine, Philadelphia, PA,  
32 USA, <sup>3</sup>Department of Genetics, University of Pennsylvania Perelman School of Medicine,  
33 Philadelphia, PA, USA, <sup>4</sup>Department of Systems Pharmacology and Translational Therapeutics,  
34 University of Pennsylvania Perelman School of Medicine, Philadelphia, PA, USA, <sup>5</sup>The Institute for  
35 Translational Genomics and Population Sciences, Department of Pediatrics, The Lundquist  
36 Institute for Biomedical Innovation at Harbor-UCLA Medical Center, Torrance, CA,  
37 USA, <sup>6</sup>Population Health Sciences Institute, Newcastle University, Newcastle upon Tyne,  
38 UK, <sup>7</sup>Department of Biomedical Informatics, Vanderbilt University Medical Center, Nashville, TN,  
39 USA, <sup>8</sup>Bioinformatics and Clinical Data Science, Gilead Sciences, Inc., Foster City, CA, USA, <sup>9</sup>VA  
40 Salt Lake City Health Care System, Salt Lake City, UT, USA, <sup>10</sup>Broad Institute of MIT and Harvard,  
41 Cambridge, MA, USA, <sup>11</sup>Department of Radiology, University of Pennsylvania Perelman School of  
42 Medicine, Philadelphia, PA, USA, <sup>12</sup>VA Palo Alto Health Care System, Palo Alto, CA,  
43 USA, <sup>13</sup>Department of Statistics, The Pennsylvania State University, University Park, PA,  
44 USA, <sup>14</sup>Huck Institutes of the Life Sciences, The Pennsylvania State University, University Park, PA,  
45 USA, <sup>15</sup>Department of Statistics, Stanford University, Stanford, CA, USA, <sup>16</sup>Department of  
46 Medicine, Stanford University School of Medicine, Stanford, CA, USA, <sup>17</sup>Mental Illness Research  
47 Education and Clinical Center, Corporal Michael J. Crescenz VA Medical Center, Philadelphia, PA,  
48 USA, <sup>18</sup>Department of Psychiatry, University of Pennsylvania Perelman School of Medicine,  
49 Philadelphia, PA, USA, <sup>19</sup>Department of Obstetrics and Gynecology, Vanderbilt University Medical  
50 Center, Nashville, TN, USA, <sup>20</sup>Center for Genomic Medicine, Massachusetts General Hospital,  
51 Boston, MA, USA, <sup>21</sup>VA Boston Healthcare System, Boston, MA, USA, <sup>22</sup>Program in Medical and  
52 Population Genetics, Broad Institute of MIT and Harvard, Cambridge, MA, USA, <sup>23</sup>Atlanta VA  
53 Medical Center, Decatur, GA, USA, <sup>24</sup>Department of Epidemiology, Emory University Rollins  
54 School of Public Health, Atlanta, GA, USA, <sup>25</sup>Department of Global Health, School of Public  
55 Health, Peking University, Beijing, China, <sup>26</sup>Department of Biostatistics, Boston University School

56 of Public Health, Boston, MA, USA, <sup>27</sup>Department of Medicine, Section of Gastroenterology,  
57 Boston University School of Medicine, Boston, MA, USA, <sup>28</sup>Department of Cardiology, The  
58 Lundquist Institute for Biomedical Innovation at Harbor-UCLA Medical Center, Torrance, CA,  
59 USA, <sup>29</sup>Department of Medicine, Children's Hospital Oakland Research Institute, Oakland, CA,  
60 USA, <sup>30</sup>Departments of Internal Medicine, Section of Digestive Diseases, and of Pathology, Yale  
61 School of Medicine, New Haven, CT, USA, <sup>31</sup>Regeneron Genetics Center, Tarrytown, NY,  
62 USA, <sup>32</sup>Department of Internal Medicine, Saint Louis University, St. Louis, MO, USA, <sup>33</sup>Department  
63 of Pediatrics, University of California San Diego, La Jolla, CA, USA, <sup>34</sup>Department of Internal  
64 Medicine, Virginia Commonwealth University School of Medicine, Richmond, VA,  
65 USA, <sup>35</sup>Department of Medicine, Indiana University School of Medicine, Indianapolis, IN,  
66 USA, <sup>36</sup>VISN 5 Capitol Health Care Network Mental Illness Research Education and Clinical  
67 Center, Baltimore, MD, USA, <sup>37</sup>Program for Personalized and Genomic Medicine, Division of  
68 Endocrinology, Diabetes and Nutrition, Department of Medicine, University of Maryland School  
69 of Medicine, Baltimore, MD, USA, <sup>38</sup>Department of Epidemiology and Biostatistics, School of  
70 Public Health, Imperial College London, London, UK, <sup>39</sup>Department of Pathology and Laboratory  
71 Medicine, University of Pennsylvania Perelman School of Medicine, Philadelphia, PA,  
72 USA, <sup>40</sup>Division of Human Genetics, Children's Hospital of Philadelphia, Philadelphia, PA,  
73 USA, <sup>41</sup>Institute for Biomedical Informatics, University of Pennsylvania Perelman School of  
74 Medicine, Philadelphia, PA, USA, <sup>42</sup>Department of Medicine, Division of Gastroenterology,  
75 University of Pennsylvania Perelman School of Medicine, Philadelphia, PA, USA, <sup>43</sup>Edith Nourse  
76 Rogers Memorial VA Hospital, Bedford, MA, USA, <sup>44</sup>Center for Population Health, University of  
77 Massachusetts, Lowell, MA, USA, <sup>45</sup>Phoenix VA Health Care System, Phoenix, AZ, USA, <sup>46</sup>College of  
78 Medicine, University of Arizona, Tucson, AZ, USA, <sup>47</sup>Division of Endocrinology, Emory University  
79 School of Medicine, Atlanta, GA, USA, <sup>48</sup>Office of Research and Development, Veterans Health  
80 Administration, Washington, DC, USA, <sup>49</sup>Department of Medicine, University of Utah School of  
81 Medicine, Salt Lake City, UT, USA, <sup>50</sup>Department of Medicine, Brigham Women's Hospital, Boston,  
82 MA, USA, <sup>51</sup>Department of Medicine, Harvard Medical School, Boston, MA, USA, <sup>52</sup>Nashville VA  
83 Medical Center, Nashville, TN, USA, <sup>53</sup>Vanderbilt Genetics Institute, Vanderbilt University Medical  
84 Center, Nashville, TN, USA, <sup>54</sup>Department of Surgery, University of Pennsylvania Perelman School  
85 of Medicine, Philadelphia, PA, USA, <sup>55</sup>Division of Cardiology, Emory University School of  
86 Medicine, Atlanta, GA, USA, <sup>56</sup>Department of Pediatrics, University of Pennsylvania Perelman  
87 School of Medicine, Philadelphia, PA, USA, <sup>57</sup>Department of Medicine, Columbia University Irving  
88 Medical Center, New York, NY, USA, <sup>58</sup>Department of Cardiology, Columbia University Irving  
89 Medical Center, New York, NY, USA, <sup>59</sup>Center for Non-Communicable Diseases, Karachi, Sindh,  
90 Pakistan, <sup>60</sup>Translational and Clinical Research Institute, Faculty of Medical Sciences, Newcastle  
91 University, Newcastle upon Tyne, UK, <sup>61</sup>Newcastle NIHR Biomedical Research Centre, Newcastle  
92 upon Tyne Hospitals NHS Foundation Trust, Newcastle upon Tyne, UK, <sup>62</sup>Division of General  
93 Internal Medicine, Massachusetts General Hospital, Boston, MA, USA, <sup>63</sup>College of Nursing and  
94 Health Sciences, University of Massachusetts, Lowell, MA, USA, <sup>64</sup>Institute of Translational  
95 Medicine and Therapeutics, University of Pennsylvania Perelman School of Medicine,  
96 Philadelphia, PA, USA

97 **Abstract**

98 Nonalcoholic fatty liver disease (NAFLD) is a growing cause of chronic liver disease. Using a  
99 proxy NAFLD definition of chronic alanine aminotransferase elevation (cALT) without other liver  
100 diseases, we performed a trans-ancestry genome-wide association study in the Million Veteran  
101 Program including 90,408 cALT cases and 128,187 controls. In the Discovery stage, seventy-  
102 seven loci exceeded genome-wide significance – including 25 without prior NAFLD or ALT  
103 associations – with one additional locus identified in European-American-only and two in  
104 African-American-only analyses ( $P < 5 \times 10^{-8}$ ). External replication in cohorts with NAFLD defined  
105 by histology (7,397 cases, 56,785 controls) or liver fat extracted from radiologic imaging  
106 ( $n = 44,289$ ) validated 17 SNPs ( $P < 6.5 \times 10^{-4}$ ) of which 9 were novel (*TRIB1*, *PPARG*, *MTTP*,  
107 *SERPINA1*, *FTO*, *IL1RN*, *COBLL1*, *APOH*, and *IFI30*). Pleiotropy analysis showed that 61 of 77  
108 trans-ancestry and all 17 validated SNPs were jointly associated with metabolic and/or  
109 inflammatory traits, revealing a complex model of genetic architecture. Our approach  
110 integrating cALT, histology and imaging reveals new insights into genetic liability to NAFLD.

111

112

## 113 Introduction

114 Chronic liver disease with progression to cirrhosis and hepatocellular carcinoma is a global  
115 health issue<sup>1</sup>. In particular, nonalcoholic fatty liver disease (NAFLD) – a hepatic phenotype  
116 associated with metabolic syndrome and insulin resistance – is an increasingly common cause  
117 of chronic liver disease with an estimated world prevalence of 25% among adults<sup>1-5</sup>. In the  
118 United States (US), NAFLD prevalence is projected to reach 33.5% among the adult population  
119 by 2030, due in large part to rising rates of obesity and other cardiometabolic risk factors<sup>6</sup>.  
120 NAFLD is defined by  $\geq 5\%$  fat accumulation in the liver (hepatic steatosis) in the absence of other  
121 known causes for liver disease, based on liver biopsy and/or non-invasive radiologic imaging<sup>3,4</sup>.  
122 The clinical spectrum of NAFLD ranges from bland steatosis to nonalcoholic steatohepatitis  
123 (NASH) involving inflammation and hepatocellular ballooning injury with progressive fibrosis. At  
124 least 20% of patients with NAFLD develop NASH with increased risk of consequent cirrhosis and  
125 primary liver cancer<sup>5,6</sup>. To date, there is no licensed drug approved to treat NAFLD and prevent  
126 its progression, and the general therapeutic approach focuses on improving the underlying  
127 metabolic disorders such as glucose control and promotion of weight loss.

128 Individual susceptibility to NAFLD involves both genetic and environmental risk factors.  
129 Current estimates of NAFLD heritability range from 20% to 50%<sup>7</sup> while risk factors for NAFLD  
130 include obesity (in particular, abdominal adiposity), insulin resistance and several features of  
131 metabolic syndrome<sup>2,5,6,8</sup>. Several genetic variants that promote the full spectrum of fatty liver  
132 disease have been identified in genome-wide association studies (GWAS) utilizing cohorts  
133 based on liver biopsy, imaging, and/or isolated liver enzyme values<sup>9-22</sup>. The most prominent  
134 variants include p.I148M in *PNPLA3* and p.E167K in *TM6SF2*, which increase NAFLD risk, and a

135 loss-of-function variant in *HSD17B13* that confers protection against NASH<sup>16</sup>. However, the  
136 limited number of genetic associations in NAFLD contrasts with other cardiometabolic disorders  
137 where hundreds of loci have been mapped to date, such as obesity<sup>23,24</sup>, type 2 diabetes<sup>25</sup>,  
138 hypertension<sup>26</sup>, and plasma lipids<sup>27</sup>. This highlights the need for expanded discovery with larger  
139 samples and greater population diversity, with further integration of functional genomics data  
140 sets to potentially identify the effector genes<sup>28</sup>.

141 The Million Veteran Program (MVP) is among the world's largest and most ancestrally  
142 diverse biobanks<sup>29</sup>. The availability of comprehensive, longitudinally collected Veterans Health  
143 Administration (VA) electronic health records for US Veteran participants in the MVP also  
144 makes it a promising resource for precision medicine. However, NAFLD is markedly  
145 underdiagnosed clinically due to the invasive nature of the liver biopsy procedure, variable use  
146 of imaging modalities and poor sensitivity of international diagnostic codes (ICD) for NAFLD<sup>4,30</sup>.  
147 The use of chronic elevation of serum alanine aminotransferase levels (cALT) as a proxy for  
148 NAFLD was shown to improve specificity and positive predictive value in the NAFLD diagnostic  
149 algorithm within the VA Corporate Data Warehouse<sup>31</sup>. Accordingly, we recently adapted and  
150 validated a cALT phenotype as a proxy for NAFLD to facilitate case identification in MVP<sup>21</sup>,  
151 applying a rigorous exclusion of other conditions that are known to increase liver enzymes (e.g.,  
152 viral hepatitis, alcoholic liver disease, autoimmune liver disease, and known hereditary liver  
153 disease). Moreover, we showed that our cALT phenotype had a sensitivity of 80%, a specificity  
154 of 89%, an accuracy of 85%, a positive predictive value of 89%, and an area-under-the-curve of  
155 87% compared to gold standard abdominal imaging, liver biopsy, and clinical notes in a well-  
156 characterized sample of 178 patients in the VA healthcare system. In the current study, we

157 applied this cALT phenotype in MVP participants of 4 ancestral groups<sup>32</sup>, and identified 90,408  
158 NAFLD cases and 128,187 controls (**Figure 1**, and **Supplementary Figure 1**).

159 Our aims are to: (i) perform a trans-ancestry genetic susceptibility analysis of the cALT  
160 phenotype in MVP; (ii) replicate the lead SNPs in external NAFLD cohorts with hepatic fat  
161 defined by liver histology or radiologic imaging; (iii) identify putative causal genes at the lead  
162 loci by using an ensemble “variant-to-gene” mapping method that integrates results from  
163 coding and functional genomic annotations, and quantitative trait loci (QTL); and (iv) describe  
164 the genetic architecture at each associated locus by characterizing the profile of additional  
165 phenotypic associations using data from the GWAS catalog, MVP LabWAS, and MRC IEU  
166 OpenGWAS database.

167

## 168 **Results**

### 169 ***An ancestry-diverse study population with a high prevalence of cardiometabolic traits***

170 Our study consisted of 90,408 cALT cases and 128,187 controls comprising four ancestral  
171 groups, namely European-Americans (EA, 75.1%), African-Americans (AA, 17.1%), Hispanic-  
172 Americans (HISP, 6.9%), and Asian-Americans (ASN, 0.9%, **Supplemental Table 1**,  
173 **Supplemental Figure 1**). Consistent with the US Veteran population, MVP cases and controls  
174 ( $n=$  218,595) were predominantly male (92.3%) with an average age of 64 years at study  
175 enrollment (**Supplemental Table 1**). The prevalence of cirrhosis and advanced fibrosis in the  
176 cALT cases ranged from 4.7% to 9.1%. With the exclusion of other known causes of liver disease  
177 as described previously<sup>21</sup>, cases were enriched for metabolic disorders (type 2 diabetes,

178 hypertension, and dyslipidemia), suggesting a link between chronic ALT elevation and metabolic  
179 risk factors.

180

### 181 ***Identification of trans-ancestry and ancestry-specific cALT-associated loci in MVP***

182 To identify genetic loci associated with cALT, we performed a trans-ancestry genome-wide scan  
183 by meta-analyzing summary statistics derived from each individual ancestry (**Methods** and  
184 **Figure 1**). In this trans-ancestry scan, 77 independent sentinel SNPs met the conventional  
185 genome-wide significance level ( $P < 5 \times 10^{-8}$ ), of which 60 SNPs exceeded trans-ancestry genome-  
186 wide significance ( $P < 5 \times 10^{-9}$ ). Of the 77 SNPs, 52 were previously reported to be associated  
187 with ALT, including 9 that were also associated with NAFLD (i.e., *PNPLA3*, *TM6SF2*, *HSD17B13*,  
188 *PPP1R3B*, *MTARC1*, *ERLIN1*, *APOE*, *GPAM*, and *SLC30A10*; *LYPLAL1*; **Figure 2** and **Supplemental**  
189 **Table 2**)<sup>9-12,14,16-22,33-35</sup>. Of the 25 newly identified loci, 14 were novel (*IL1RN*, *P2RX7*, *CASP8*,  
190 *MERTK*, *TRPS1*, *OGFRL1*, *HLA*, *SMARCD2*; *DDX42*, *CRIM1*, *FLT1*, *DNAJC22*, *HKDC1*, *UHRF2*,  
191 *STAP2*; *MPND*), whereas 11 have been associated with gamma-glutamyl transferase (GGT)  
192 and/or alkaline phosphatase (ALP) levels<sup>35</sup>.

193 In the ancestry-specific analyses, 55 loci in EAs, eight loci in AAs, and three in HISPs  
194 exceeded conventional genome-wide significance ( $P < 5 \times 10^{-8}$ , **Supplemental Tables 3-5** and  
195 **Supplemental Figures 2-4**), of which 1 EA SNP and 2 AA SNPs were not captured in the trans-  
196 ancestry analysis. No variants among ASN subjects achieved genome-wide significance, likely  
197 due to limited sample size (**Supplemental Figure 5**). Notably, the top two SNPs in the AA-only  
198 scan (with the genes *GPT* and *ABCB4* nearby each SNP, respectively) showed stronger



199 associations than observed for *PNPLA3*. These two SNPs are polymorphic among AA's but  
200 nearly monomorphic in all other populations.

### 201 ***Replication of cALT-associated loci in liver biopsy and radiologic imaging data***

202 To validate that our cALT-associated SNPs capture genetic susceptibility to NAFLD, we  
203 assembled two external NAFLD cohorts, namely: (i) a **Liver Biopsy Cohort** consisting of 7,397  
204 histologically characterized NAFLD cases and 56,785 population controls from various clinical  
205 studies (**Supplemental Table 6-7**), and (ii) a **Liver Imaging Cohort** consisting of 44,289  
206 participants with available radiologic liver imaging data and quantitative hepatic fat (qHF)  
207 measurements (**Supplemental Table 8**). For each cohort, we performed a trans-ancestry lookup  
208 of the 77 lead SNPs (**Methods**). In the Liver Biopsy Cohort, there was directional concordance  
209 between effect estimates of biopsy-defined NAFLD in 66 of 77 SNPs (86%), including 15 SNPs  
210 with a significant association (adjusted Bonferroni nominal  $P < 6.5 \times 10^{-4}$ ), of which 8 have not  
211 been reported in genome- or exome-wide association studies previously (e.g., *TRIB1*, *MTTP*,  
212 *APOH*, *IFI30*, *COBLL1*, *SERPINA1*, *IL1RN*, and *FTO*, **Supplemental Table 7**)<sup>12</sup>. In the Liver Imaging  
213 Cohort, there was directional concordance between effect estimates of qHF in 49 of 77 SNPs  
214 (64%). Among these, 11 were significantly associated with qHF (adjusted Bonferroni nominal  $P$   
215  $< 6.5 \times 10^{-4}$ , **Supplemental Table 8**) of which 6 were novel (e.g., *TRIB1*, *MTTP*, *APOH*, *IFI30*,  
216 *COBLL1*, and *PPARG*). As observed in previous studies owing to its role in glycogen storage (and  
217 associated impact on imaging)<sup>12,36</sup>, the *PPP1R3B* locus was significantly associated with qHF,  
218 however in the opposite direction from cALT, and not associated with biopsy-proven NAFLD.  
219 Collectively, 17 of 77 SNPs were validated in external histologic and/or radiologic NAFLD, of  
220 which nine were previously unreported; namely, five in both biopsy and imaging cohorts

221 (*TRIB1*, *MTTP*, *APOH*, *IFI30*, and *COBLL1*), three in biopsy cohort alone (*FTO*, *SERPINA1*, and  
222 *IL1RN*) and one in imaging cohort with a nominal significance in biopsy cohort (*PPARG*)  
223 (**Supplemental Table 2**). An additional 24 SNPs were nominally associated ( $P < 0.05$ ) with  
224 directional concordance with histological and/or radiologic hepatic fat.

225 We performed a SNP-specific statistical power analysis to investigate the SNP-specific  
226 type I error ( $\alpha$ ) at a P-value of  $= 6.5 \times 10^{-4}$  (Bonferroni) using the respective effect estimates and  
227 allele frequencies (**Supplemental Table 2 and 7**). A total of 22 loci showed sufficient statistical  
228 power ( $> 80\%$ ) for replication in the liver biopsy cohort, of which 10 replicated (**Supplemental**  
229 **Figure 6**). Despite sufficient power, 12 SNPs did not replicate in the liver biopsy cohort, which  
230 included *GPT*, *PPP1R3B*, *OGFRL1*, *TNFSF10*, and *PANX1*. Remarkably, in the group of 55 SNPs  
231 without sufficient statistical power for replication, 6 SNPs did in fact replicate (namely *PPARG*,  
232 *MTTP*, *FTO*, *IL1RN*, *IFI30*, and *COBLL1*). We note that for cALT SNPs which were replicated in the  
233 histological NAFLD cohort, their effect size in histological NAFLD cohort were, on average 92.4%  
234 higher than cALT effect estimate (**Supplemental Figure 7 and 8**). Extrapolating to the remaining  
235 49 SNPs without 80% statistical power for replication, 22 SNPs showed higher effect sizes for  
236 histological NAFLD than cALT and were therefore labeled as candidate NAFLD loci  
237 (**Supplemental Table 2**).

238

### 239 ***Genetic risk scores and histologically characterized NAFLD***

240 We next constructed genetic risk scores (GRSs) based on effect estimates from our cALT GWAS  
241 SNPs in four independent liver biopsy cohorts to quantify the cumulative predictive power of  
242 our 77 sentinel variants (**Supplemental Table 9A**, **Supplemental Figure 9**). A 77 SNP-based GRS

243 was predictive of NAFLD in the meta-analyzed liver biopsy cohorts (GRS-77,  $P = 3.7 \times 10^{-28}$ ).  
244 Stratification of GRS-77 into a GRS consisting of a set of 9 well-established NAFLD SNPs (GRS-9),  
245 and a GRS consisting of 68 remaining SNPs (GRS-68) revealed significant independent capacity  
246 to predict histologically characterized NAFLD (GRS-9,  $P = 2.2 \times 10^{-11}$ ; GRS-68,  $P = 2.4 \times 10^{-7}$ ), further  
247 supporting the clinical relevance of our panel of SNPs derived from proxy NAFLD phenotype.  
248 We further examined the SNPs in three groups based on their strength of external replication:  
249 (i) replicated at Bonferroni threshold; (ii) achieving nominal significance ( $P < 0.05$ ) with  
250 directional concordance without reaching Bonferroni significance; and (iii)  $P > 0.05$ . As shown in  
251 **Supplemental Figure 10** and **Supplementary Table 9C**, a significant capacity for NAFLD  
252 prediction was noted not only for externally replicated SNPs (Beta: 0.644,  $P = 2.53 \times 10^{-10}$ ) but  
253 also the nominal SNPs set albeit with attenuated effect (Beta: 0.198,  $P = 1 \times 10^{-4}$ ).

254

### 255 ***cALT heritability and genetic correlations with other phenotypes***

256 To further characterize the architecture of our cALT phenotype and its relationship with other  
257 traits, we estimated heritability and genetic correlations with other traits using linkage  
258 disequilibrium (LD) score regression<sup>37-39</sup> (**Methods**). The SNP-based liability-scaled heritability  
259 was estimated at 16% (95% CI: 12-19,  $P < 1 \times 10^{-6}$ ) in EA. Genetic correlation analysis between  
260 NAFLD from the EA-only scan and 774 complex traits from LD Hub (**Methods**) identified a total  
261 of 116 significant associations (adjusted Bonferroni nominal  $P < 6.5 \times 10^{-5}$ , **Supplemental Table**  
262 **10**). These encompassed 78 cardiometabolic risk factors (67.2%) including measures of obesity  
263 and adiposity, type 2 diabetes, hypertension, dyslipidemia, and coronary artery disease, which  
264 is consistent with reports from observational studies correlating these traits to NAFLD<sup>40</sup>.

265 Additional genetically correlated traits represented general health conditions (11.2%),  
266 educational attainment and/or socio-economic status (12.0%) and other conditions such as  
267 gastro-oesophageal reflux, osteoarthritis, gout, alcohol intake, smoking, ovary removal, and  
268 urinary albumin-to-creatinine ratio (9.5%).

269

### 270 ***Identification of conditionally independent cALT-associated variants***

271 To discover additional conditionally independent cALT signals within the 77 genomic regions,  
272 we performed exact conditional analysis using stepwise regression on individual level data for  
273 all single-ancestry sentinel variants (namely 51 EA, 8 AA, and 3 HISP genomic regions). We  
274 detected a total of 29 conditionally independent SNPs ( $P < 1 \times 10^{-5}$ ) flanking five known and 16  
275 novel cALT loci in EA (**Supplemental Table 11**). In particular, the *GPT* locus showed the highest  
276 degree of regional complexity with 4 conditionally independent SNPs, followed by *AKNA* with 3  
277 conditionally independent SNPs. For one novel locus located on chromosome 12 between 121-  
278 122Mb, the trans-ancestry lead variant (rs1626329) was located in *P2RX7*, whereas the lead  
279 peak variant for EA mapped to *HNF1A* (rs1169292, **Supplemental Figure 11**). Both variants are  
280 in strong LD with distinct coding variants (*P2RX7*: rs1718119, Ala348Thr; *HNF1A*: rs1169288,  
281 Ile27Leu) and are compelling candidate genes for metabolic liver disease. In AA, we observed a  
282 total of six conditionally independent variants at three genomic regions, namely three variants  
283 at *GPT*, two at *AKNA* and one at the *ABCB4* locus (**Supplemental Table 11**). No conditionally  
284 independent variants were identified in Hispanic Americans. Collectively, 35 additional variants  
285 were identified at 22 loci across multiple ancestries by formal conditional analysis.

286

287 ***Fine mapping to define potential causal variants in 95% credible sets***

288 To leverage the increased sample size and population diversity to improve fine-mapping  
289 resolution, we computed statistically derived 95% credible sets using Wakefield's approximate  
290 Bayes' factors<sup>41</sup> using the trans-ancestry, EA, AA, and HISP summary statistics (**Supplemental**  
291 **Table 12-15, Methods**. Trans-ancestry fine-mapping reduced the median 95% credible set size  
292 from 9 in EA (with IQR 3 - 17) to 7.5 variants (IQR 2 - 13). A total of 11 distinct cALT associations  
293 (e.g. *MTARC1*, *IL1RN*, *OGFRL1*, *PPP1R3B*, *SOX7*; *RP1L1*; *C8orf74*, *TRIB1*, *ERLIN1*, *TRIM5*,  
294 *OSGIN1*; *MLYCD*, *TM6SF2* and *PNPLA3*) were resolved to a single SNP in the trans-ancestry meta-  
295 regression, with an 4 additional loci suggesting single SNP sets from EA (n=2) and AA (n=2)  
296 ancestry-specific scans.

297

298 ***Liver-specific enrichment of cALT heritability***

299 To ascertain the tissues contributing to the disease-association underlying cALT heritability, we  
300 performed tissue-specific heritability analysis using stratified LD score regression. The strongest  
301 associations were observed for genomic annotations surveyed in liver, hepatocytes, adipose,  
302 and immune cell types among others (e.g., liver histone H3K36me3 and H3K4me1, adipose  
303 nuclei H3K27ac, spleen TCR $\gamma\delta$ , eosinophils in visceral fat;  $P < 0.003$ , **Supplemental Table 16**).  
304 Medical subject heading (MeSH)-based analysis showed enrichment mainly in hepatocytes and  
305 liver (False Discovery Rate (FDR)  $< 5\%$ , **Supplemental Table 17**). Gene set analysis showed  
306 strongest associations for liver and lipid-related traits ( $P$ -value  $< 1 \times 10^{-6}$ , **Supplemental Table**  
307 **18**). Enrichment analyses using publicly-available epigenomic data implemented in GREGOR  
308 enrichment analysis (**Methods**) showed that most significant enrichments were observed for

309 active enhancer chromatin state in liver, epigenetic modification of histone H3 in hepatocytes  
310 or liver-derived HepG2 cells (e.g. H3K27Ac, H3K9ac, H3K4me1, H3K4me3; adjusted Bonferroni  
311 nominal  $P < 1.8 \times 10^{-5}$ , **Supplemental Table 19 and 20**). These analyses additionally support the  
312 hypothesis that our cALT GWAS captures multiple physiological mechanisms that contribute to  
313 NAFLD heritability. Furthermore, DEPICT-based predicted gene function nominated 28 gene  
314 candidates, including the known genes *PNPLA3* and *ERLIN1* (FDR <5%, **Supplemental Table 21**),  
315 as well as well-known cardiometabolic disease genes such as *PPARG*.

316

### 317 ***Coding variants in putative causal genes driving cALT associations***

318 There were six novel trans-ancestry loci for which the lead SNP is a coding missense variant  
319 (**Supplementary Table 22**), namely Thr1412Asn in *CPS1*, Glu430Gln in *GPT*, Val112Phe in *TRIM5*,  
320 Ala163Thr in *DNAJC22*, Glu366Lys in *SERPINA1* and Cys325Gly in *APOH*. To identify additional  
321 coding variants that may drive the association between the lead SNPs and cALT risk, we  
322 investigated predicted loss of function (pLoF) and missense variants in high LD to the identified  
323 cALT lead variants ( $r^2 > 0.7$  in each respective 1000 Genomes super-population, **Supplemental**  
324 **Table 22**). Four previously described missense variants were replicated in the current study,  
325 including Thr165Ala in *MTARC1*, Ile291Val in *ERLIN1*, Glu167Lys in *TM6SF2* and Ile148Met in  
326 *PNPLA3*. Among novel loci, missense variants in high LD with lead variants included the genes  
327 *CCDC18*, *MERTK*, *APOL3*, *PPARG*, *MTTP*, *MLXIPL*, *ABCB4*, *GPAM*, *SH2B3*, *P2RX7*, *ANPEP*, *IFI30*  
328 and *MPV17L2*. Two additional missense variants were observed in *AKNA* and *NYNRIN*, however  
329 the coding variants were outside of the calculated boundaries of their respective credible sets.  
330 Among the trans-ancestry coding missense variants, eleven were predicted based on two

331 methods (SIFT, PolyPhen-2) to have potentially deleterious and/or damaging effects in protein  
332 function (**Supplementary Table 22**)<sup>42,43</sup>. An AA-specific locus on chromosome 7 (rs115038698,  
333 chr7:87024718) was in high LD to a nearby missense variant Ala934Thr in *ABCB4* (rs61730509,  
334 AFR  $r^2=0.92$ ) with a predicted deleterious effect, where the T-allele confers an increased risk of  
335 cALT ( $\beta=0.617$ ,  $P=1.8 \times 10^{-20}$ ). In summary, among our 77 trans-ancestry loci, 24 prioritized a  
336 candidate gene based on a missense variant in high LD with the lead SNP, including 5 novel loci  
337 with external validation (e.g., *SERPINA1*, *APOH*, *PPARG*, *MTTP* and *IFI30;MPV17L2*).

338

### 339 ***Additional approaches to nominating putative causal genes***

340 *Co-localization analyses:* We performed colocalization analyses with gene expression and  
341 splicing across 48 tissues measured by the GTEx project, and overlapped our lead SNPs with  
342 histone quantitative trait locus (QTL) data from primary liver to identify cALT-associated  
343 variants that are also associated with change in gene expression (eQTLs), splice isoforms  
344 (sQTLs), or histone modifications (hQTLs, **Methods, Supplemental Table 23**). Across all tissues,  
345 a total of 123 genes were prioritized, including 20 genes expressed in liver tissue (**Methods**).  
346 For liver tissue alone, a total of eight variant-gene pairs were identified where the allele  
347 associated with protection against cALT was also associated with reduced transcription levels.  
348 Furthermore, sQTL analysis in GTEx v8 identified two genes in the liver (*HSD17B13* and *ANPEP*)  
349 and 13 genes that were affected in at least two tissues (**Supplemental Table 24**). Finally, two of  
350 our lead SNPs were in high LD ( $r^2 > 0.8$ ) with variants that regulated H3K27ac levels in liver  
351 tissue (hQTLs), namely *EFHD1* (hQTL SNPs rs2140773, rs7604422 in *EFHD1*) and *FADS2* loci  
352 (hQTL rs174566 in *FADS2*)<sup>44</sup>.

353 Assay for chromatin accessibility using liver-derived cells: We next mapped our cALT loci to  
354 regions of open chromatin using ATAC-seq in three biologically-relevant liver-derived tissues  
355 (human liver, liver cancer cell line [HepG2], and hepatocyte-like cells [HLC] derived from  
356 pluripotent stem cells)<sup>45</sup>. Additionally, we used promoter-focused Capture-C data to identify  
357 those credible sets that physically interact with genes in two relevant cell types (HepG2 and  
358 liver). For each credible set, we identified genes with significant interactions (CHiCAGO score >  
359 5, **Methods**) that overlap with at least one lead variant (**Supplemental Table 25**). These  
360 datasets are useful entry points for deciphering regulatory mechanisms involved in the  
361 pathophysiology of NAFLD. Based on DEPICT gene prediction, coding variant linkage analysis,  
362 and QTL colocalization (**Supplemental Tables 18-25**), 215 potentially relevant genes were  
363 identified for the 77 loci. A protein-protein interaction (PPI) analysis revealed that among the  
364 192 available proteins, 86 nodes were observed, with strong PPI enrichment ( $P < 9.0 \times 10^{-8}$ )  
365 indicating that the protein network shows substantially more interactions than expected by  
366 chance (**Supplemental Table 26 and Supplemental Figure 12**).

367

### 368 **Variation-to-Gene Ensemble Mapping Approach to nominate putative causal genes**

369 We developed an ensemble method for predicting the likely causal effector gene at 77 loci  
370 based on 8 distinct gene-mapping analyses, including: SNP-gene overlap, DEPICT gene  
371 prediction, coding variant linkage, colocalization with eQTL, sQTL and hQTL, promoter Capture-  
372 C and/or ATAC-Seq peak overlap, and PPI network analysis. For each gene that resides in a  
373 sentinel locus, the number of times that it was identified in the eight analyses was summarized  
374 into a nomination score which reflects the cumulative evidence that the respective gene is the



375 causal effector gene in the region. This ensemble method for mapping variants to genes  
376 resulted in the nomination of a single gene as the causal effector gene at 53 of 77 genomic loci.  
377 At the remaining 24 loci, two loci lacked any data to support the nomination of a causal gene,  
378 and at 22 loci two or more causal genes were nominated because they shared the maximum  
379 nomination score (**Supplemental Table 27**). We highlighted 35 loci for which a causal gene was  
380 prioritized by at least 3 sources of evidence (or 4 sources of evidence for coding variants) in  
381 **Table 1a/b**. These included 6 loci with co-localizing eQTLs in liver or adipose tissues and  
382 connection to the predicted gene via Promoter CaptureC data (i.e., *EPHA2*, *IL1RN*, *SHROOM3*,  
383 *HKDC1*, *PANX1*, *DHODH*;HP).

384 Gene expression of nominated genes in the Liver Single Cell Atlas: To confirm that the  
385 nominated genes are involved in liver biology, we performed a gene expression lookup in single  
386 cell RNA-Seq data from the Liver Single Cell Atlas<sup>46</sup>. As a result, for 76 of 77 loci a gene was  
387 nominated that was expressed in at least one liver cell type, with exception of the rs9668670  
388 locus which nominated several keratin genes (*KRT84*; *KRT82*; *KRT74*) (**Supplemental Table 27**).

389

### 390 **Transcription factor analysis**

391 We observed that 14 nominated genes are transcription factors (TF) (**Supplemental Table 28**).  
392 Using the DoRothEA data in OmniPath, we identified that two of these TFs have several  
393 downstream target genes that were also identified in our GWAS scan (**Methods**). Notably, the  
394 CEBPA TF targets the downstream genes *PPARG*, *TRIB1*, *GPAM*, *FTO*, *IRS1*, *CRIM1*, *HP*, *TBC1D8*,  
395 and *CPS1*, but also *NCEH1*, a gene in the vicinity of one of our associations that lacked a

396 nominated candidate gene. Similarly, *HNF1A*, the lead gene in the EA scan (and corresponding  
397 to the trans-ancestry *P2RX7* locus) targets *SLC2A2*, *MTTP*, and *APOH*.

398

### 399 ***Pleiotropy and related-trait genetic architecture of lead cALT SNPs***

400 We next sought to identify additional traits that were associated with our 77 trans-ancestry  
401 lead SNPs using four different approaches. First, a LabWAS of distinct clinical laboratory test  
402 results<sup>47</sup> in MVP (**Methods**) yielded 304 significant SNP-trait associations (adjusted Bonferroni  
403 nominal  $P = 3.1 \times 10^{-5}$ , **Supplemental Table 29, Supplemental Figure 13**). Second, a PheWAS  
404 Analysis in UK Biobank data using SAIGE (**Methods**) identified various SNP-trait associations  
405 that mapped to loci previously associated with liver and cardiometabolic traits, as well as  
406 additional enriched association for gallstones, gout, arthritis, and hernias (adjusted Bonferroni  
407 nominal  $P < 4.6 \times 10^{-7}$ , **Supplemental Table 30**). In particular, we examined all associations for  
408 PheCode 571.5, “Other chronic nonalcoholic liver disease” which comprised 1,664 cases and  
409 400,055 controls, which with a disease prevalence of 0.4% seems to be underreported. Still, of  
410 the 73 variants with available data, 14 were both nominally associated and directionally  
411 consistent with our scan (signed binomial test  $P=3.4 \times 10^{-9}$ ), providing additional validation for  
412 our scan (**Supplementary Table 31**). Third, a SNP lookup using the curated data in the MRC IEU  
413 OpenGWAS project (**Supplemental Table 32**) identified 2,892 genome-wide significant SNP-trait  
414 associations for trans-ancestry SNPs, with additional 283 SNP-trait associations for the ancestry-  
415 specific lead SNPs. Finally, we performed cross-trait regional colocalization analyses of EA, AA,  
416 and HISP lead loci with 36 other GWAS statistics of cardiometabolic and blood cell related traits

417 **(Methods)**. This resulted in significant regional colocalization for 64 SNP-trait pairs in EA, 32  
418 SNP-trait pairs in AA, and 12 SNP trait pairs in HISP (**Supplemental Table 33**).

419 Based on the four analyses described above, we selected all SNP-trait associations  
420 relevant phenotypes to NAFLD biology and classified them as liver (e.g. ALT, ALP, AST, and GGT),  
421 metabolic (e.g. HDL, LDL, and total cholesterol, triglycerides, BMI, glucose, and HbA1c), or  
422 inflammatory traits (e.g., C-reactive protein, white blood cell count, lymphocyte count,  
423 granulocytes, neutrophils, monocyte count, basophils, eosinophils, and myeloid white cells)  
424 (**Supplemental Tables 29-33 Figure 3**). Across the trans-ancestry lead variants (n=77), ancestry-  
425 specific variants (n=3), and secondary proximal associations (*HNF1A*, n=1), 17 trans-ancestry  
426 and one EA-specific SNPs showed association with only liver traits (**Figure 3**). In contrast, 17  
427 trans-ancestry and 3 ancestry-specific loci showed associations with both liver and metabolic  
428 traits whereas 4 trans-ancestry loci showed associations with both liver and inflammatory  
429 traits. Finally, 39 trans-ancestry loci showed association with all three traits: liver enzymes,  
430 cardiometabolic traits, and inflammation, including 15 of 17 loci that were externally validated  
431 in liver biopsy and/or imaging cohorts (color-coded in red in **Figure 3**). Collectively, our findings  
432 identify novel cALT-associated genetic loci with pleiotropic effects that may impact hepatic,  
433 metabolic and inflammatory traits.

434

#### 435 **Pleiotropy-stratified GRS and histological NAFLD.**

436 The foregoing analyses raised the possibility that SNPs with greater pleiotropy relative to  
437 metabolic and/or inflammatory traits beyond liver-related traits may have greater contributions  
438 to NAFLD. To this end, we compared the GRS between four subgroups of trans-ancestry SNPs as

439 defined in **Figure 3** Venn Diagram including: (i) 17 SNPs only associated with liver traits; (ii) 5  
440 SNPs associated with liver and inflammatory traits; (iii) 17 SNPs associated with liver and  
441 metabolic traits; and (iv) 38 SNPs associated with liver, cardiometabolic and inflammatory  
442 traits. As shown in **Supplemental Table 9D**, all 4 subgroups showed significant capacity to  
443 predict NAFLD. However, the strongest effect was observed for the group combining all three  
444 traits (Beta = 0.592,  $P=2.8 \times 10^{-9}$ ) followed by liver and metabolic traits (Beta = 0.148,  $P=4.6 \times$   
445  $10^{-6}$ ), whereas liver trait alone and liver with inflammatory traits showed significant but  
446 reduced effects (**Supplementary Figure 14**). Collectively, these findings show greater NAFLD  
447 associations for pleiotropic SNPs that combine liver, metabolic and inflammatory traits.

448

#### 449 **Directional Pleiotropy and Associated Gene Clusters.**

450 Finally, we visualized the direction and strength of the associations between the 77 trans-  
451 ancestry loci and 7 inflammatory biomarkers and 13 cardiometabolic traits in a heatmap (**Figure**  
452 **4**). The loci were grouped into 7 broad gene clusters using stratified agglomerative hierarchical  
453 clustering (**Methods**). Gene cluster 1 consisted of 5 trans-ethnic loci (including *APOE*), for which  
454 cALT risk alleles were associated with increased LDL and total cholesterol, apolipoprotein B1,  
455 and markers of inflammation. Gene cluster 2 comprised of genes (such as *IL1RN*, *MTARC1*,  
456 *GPAM*, and *TRIB1*) for which the cALT risk alleles were associated with increased LDL and total  
457 cholesterol, apolipoprotein B1, but decreased levels of inflammatory markers. The majority of  
458 the SNPs in cluster 1 and 2 were additionally characterized by lower triglyceride levels, but not  
459 all. Gene cluster 3 (including *MTTP*) included genes that showed predominantly positive  
460 associations with apolipoprotein B1, LDL and total cholesterol. Gene cluster 4 was characterized

461 by a lack of distinctive biomarker co-association profiles. The genes in cluster 5 (including  
462 *PNPLA3*, *ERLIN1*, and *PPP1R3B*) were characterized by higher rates of type 2 diabetes, but  
463 decreased levels of triglycerides, LDL cholesterol, HDL cholesterol, apolipoprotein B1,  
464 apolipoprotein A1, white blood cell count, and neutrophils. The genes in cluster 6 (e.g., *PPARG*,  
465 and *SLC30A10*) were associated with higher triglycerides and type 2 diabetes, but decreased sex  
466 hormone binding globulin (SHBG), HDL cholesterol, and apolipoprotein 1A. Finally, the 3 genes  
467 in cluster 7 (including *TM6SF2* and *FTO*) were associated with increased inflammatory markers,  
468 but lower apolipoprotein B1, total and LDL cholesterol. Interestingly, for a total of 9 SNPs  
469 (*TRIB1*, *PPARG*, *SLC30A10* [former *LYPLAL1*], *MLXIP*, *CEBPA*, *COBLL1*, *C6orf223*, *MIR5702*, and  
470 *SH2B3*) the cALT risk allele was associated with lower BMI, consistent with a “lean NAFLD”  
471 phenotype. Similarly, the cALT risk alleles of *SERPINA1* and *OSGIN1* loci seemed to be  
472 associated with lower rates of type 2 diabetes, and *SH2B3* and *SLC2A2* with lower glucose and  
473 HbA1c. Overall, these directional associations define distinct characteristics for each loci and  
474 clusters with potential biological implications.

475

## 476 **Discussion**

477 In this study, we describe the first of its kind multi-ancestry GWAS of cALT as a proxy for NAFLD,  
478 which resulted in a total of 77 trans-ancestry loci, of which 25 have not been associated with  
479 NAFLD or ALT before. We additionally identified three ancestry-specific loci, as well as 29  
480 conditionally independent SNPs in EAs and six in AAs. We assembled two external replication  
481 cohorts with histologically confirmed NAFLD (7,397 NAFLD cases and 56,785 population  
482 controls) and hepatic fat defined by imaging (n = 44,289), and validated the association of 17

483 SNPs with NAFLD, of which nine are novel (*TRIB1*, *PPARG*, *MTTP*, *SERPINA1*, *FTO*, *IL1RN*,  
484 *COBLL1*, *APOH*, and *IFI30*). Furthermore, a GRS based on novel SNPs alone was predictive of  
485 histologically defined NAFLD.

486 Pleiotropy analysis allowed us to characterize the genetic architecture of NAFLD and all  
487 validated SNPs showed significant associations with metabolic risk factors and/or inflammatory  
488 traits, the most common being plasma lipid-related, followed by glycemic traits, hypertension,  
489 and cardiovascular disease. A GRS based on the subset of SNPs that are associated with cALT,  
490 cardiometabolic traits, and inflammatory markers showed the highest capacity to predict  
491 histological NAFLD. Our ensemble variant-to-gene mapping method nominated a single causal  
492 effector gene at 53 genomic loci. We found that these genes were highly expressed in one or  
493 more cell types in the liver and have prior biological connections to liver metabolism,  
494 physiology, or disease, making this list compelling for further interrogation. Our directional  
495 pleiotropy analysis for metabolic risk factors are overall concordant with the results from Sliz et  
496 al, which investigated 4 NAFLD SNPs (*LYPLAL1*, *PNPLA3*, *GCKR*, and *TM6SF2*).<sup>48</sup> In addition to  
497 associations with inflammatory markers, we show that the risk alleles of *TM6SF2*, *PNPLA3*, and  
498 *SLC30A10* (former *LYPLAL1*) are positively associated with type 2 diabetes and HbA1c.  
499 Collectively, our findings offer a comprehensive, expanded, and refined view of the genetic  
500 contribution to cALT with potential clinical, pathogenic, and therapeutic relevance.

501 Our proxy NAFLD phenotype was based on chronic ALT elevation with the exclusion of  
502 other known diagnoses of liver disease or causes of ALT elevation (e.g. viral hepatitis, alcoholic  
503 liver disease, hemochromatosis), based on previous validation within VA population<sup>21,31</sup>. In this  
504 regard, several GWAS studies of liver enzyme levels have been reported, particularly of serum

505 ALT<sup>10,11,16,34,35</sup>, but not all studies systematically excluded other causes of ALT elevation. For  
506 example, Pazoki *et al.* recently reported 230 loci related to ALT, of which 52 were also included  
507 in our panel of 77 (67.5%) lead cALT loci<sup>34,35</sup>. While our cALT approach was designed to enhance  
508 the specificity of non-invasive NAFLD diagnosis<sup>21,31</sup>, this overlap is not surprising given the high  
509 prevalence of NAFLD in the general population. Furthermore, we noted that inflammatory traits  
510 were associated with over half of the cALT loci in our study. Indeed, while ALT can be normal in  
511 patients with hepatic steatosis, we focused on chronic ALT elevation that represents ongoing  
512 hepatocellular injury that can promote liver disease progression. For our controls, we excluded  
513 individuals with mild ALT elevation and selected healthier ‘super-controls’ to minimize potential  
514 phenotype misclassification (e.g. attributing cases as controls). We recognize that some cALT  
515 loci such as GPT may be involved more directly in ALT biology rather than NAFLD. Based on the  
516 observation that replicated SNPs had higher effect sizes in the histological cohort than for cALT,  
517 we hypothesize that 22 non-replicated SNPs with higher effect sizes for histological NAFLD than  
518 cALT are candidate loci for NAFLD. In addition, our pleiotropy analyses suggest that 24 non-  
519 replicated cALT SNPs associated with metabolic and inflammatory traits are more likely to be  
520 related to NAFLD, of which 12 SNPs overlap with the list of candidate NAFLD loci.

521 The MVP is one of the world’s largest and most ancestrally diverse biobanks, of which  
522 25% of the participants are of non-white ancestry, and this diversity enhanced the value of this  
523 study. Utilizing data from multiple ancestries allowed us to narrow down putative causal  
524 variants for NAFLD through trans-ancestry fine-mapping. Moreover, we identified two cALT  
525 NAFLD loci specifically in AAs. For example, the lead SNP at the *ABCB4* locus (rs115038698) was  
526 in high LD with the missense variant rs61730509 (Ala934Thr, AFR  $r^2=0.92$ ) and had a very

527 potent effect (OR=1.87, CI=1.64-2.14,  $P=1.8 \times 10^{-20}$ ). This variant is of low frequency in AA  
528 (MAF=1.2%) but virtually absent in EA and ASN. *ABCB4*, also known as multidrug resistance  
529 protein 3 (*MDR3*), is a compelling candidate gene, as it is involved in hepatocyte lipid transport  
530 and has been previously implicated in cholestasis, gallbladder disease, and adult biliary  
531 fibrosis/cirrhosis<sup>49-51</sup>.

532 Ultimately, the affirmative external validation of our lead cALT loci in NAFLD cohorts  
533 with liver biopsies and imaging supports the relevance of our proxy phenotype for NAFLD. A  
534 total of 17 loci associated with cALT were also significantly associated with hepatic fat based on  
535 liver biopsy and/or radiological imaging. These included loci previously associated with NAFLD  
536 or all-cause cirrhosis (e.g., *PNPLA3*, *TM6SF2*, *HSD17B13*, *MTARC1*, *ERLIN1*, *GPAM*, and *APOE*),  
537 but also included several of the novel loci reported here (e.g., *TRIB1*, *SERPINA1*, *MTPP*, *IL1RN*,  
538 *IFI30*, *COBLL1*, *APOH*, *FTO*, *PPP1R3B* and *PPARG*). For all loci except *PPP1R3B*, we observed  
539 concordant directionality of effects between cALT and hepatic fat. The apparent discrepancy in  
540 the *PPP1R3B* locus has been reported before<sup>12</sup> and may represent diffuse attenuation on  
541 radiologic images due to hepatic accumulation of glycogen<sup>36,52</sup> rather than triglycerides<sup>53</sup>. These  
542 novel and validated genes make excellent gene candidates for NAFLD. In addition, our study  
543 failed to replicate the *GCKR* locus, where a common missense variant (rs780094) has been  
544 repeatedly shown to confer susceptibility to NAFLD<sup>20</sup>. The SNP is a risk factor for increased  
545 triglycerides, C-reactive protein, LDL cholesterol, but seems to be protective for T2D, fasting  
546 glucose, alcohol intake, AUD, BMI, and monocyte percentage. It is hypothesized that the  
547 variant *GCKR* protein loses interaction efficiency with glucokinase, which promotes hepatic  
548 glucose metabolism, decreases plasma glucose levels, and increases NAFLD risk<sup>54</sup>. Our



549 phenotype might not be a suitable proxy for NAFLD for SNPs that act through multiple  
550 pathways with opposing effects on ALT.

551 A substantial fraction of our cALT loci showed a shared genetic co-architecture with  
552 metabolic traits (**Figure 4**). Of interest is that for 9 SNPs the cALT risk allele was associated with  
553 lower BMI, including *PPARG*. These SNPs seem to exhibit mild lipodystrophic effects,  
554 characterized by reduced adipose tissue and increased hepatic steatosis. Further study is  
555 required to clarify whether and which loci are working primarily in adipose tissue with a  
556 secondary effect on liver steatosis.

557 Several genes and liver-enriched transcription factors involved in LDL and triglyceride  
558 pathways have been indentified, such as the liver-biopsy and/or imaging validated *TRIB1*,  
559 *FTO*<sup>55,56</sup>, *COBLL1*<sup>57,58</sup>, *MTTP*, *TM6SF2*, *PPARG*, *APOE*, and *GPAM*<sup>59-62</sup>, but also the cALT-only  
560 associated variants in *MLXIPL*, *MLXIP*, *CEBPA*, *FADS2*, *APOH*, *RORA*, and *HNF1A*. *TRIB1*  
561 presumably regulates VLDL secretion by promoting the degradation carbohydrate-response  
562 element binding protein (ChREBP, encoded by *MLXIPL*), reducing hepatic lipogenesis and  
563 limiting triglyceride availability for apolipoprotein B (apoB) lipidation. Furthermore, *TRIB1* co-  
564 activates the transcription of *MTTP*, which encodes the microsomal triglyceride transfer protein  
565 that loads lipids onto assembling VLDL particles and facilitates their secretion by hepatocytes.  
566 Lomitapide, a small molecule inhibitor of *MTTP*, is approved as a treatment for lowering LDL  
567 cholesterol in homozygous familial hypercholesterolemia<sup>63</sup> and a potential therapeutic target  
568 for NAFLD. *TRIB1* is also involved in the degradation of the key hepatocyte transcription factor,  
569 CCAAT/enhancer-binding protein alpha (*CEBPA*)<sup>64</sup>, which together with *HNF1A* (HNF1  
570 Homeobox A), *RORα* (retinoic acid receptor-related orphan receptor-α) and *MIR-122* are

571 involved in a feedback loop of the the liver-enriched transcription factor network to control  
572 hepatocyte differentiation<sup>65</sup>. ROR $\alpha$  is also a suppressor of transcriptional activity of peroxisome  
573 proliferator-activated receptor  $\gamma$  (PPAR $\gamma$ )<sup>66,67</sup>. *PPARG*, encoding PPAR $\gamma$ , upregulates LDL-  
574 receptor-related protein 1 (*LRP1*), which facilitates the hepatic uptake of triglyceride-rich  
575 lipoproteins via interaction with apolipoprotein E (apoE)<sup>68,69</sup>. *PPARG* is predominantly  
576 expressed in adipose tissue, and hepatic expression levels of *PPARG* are significantly increased  
577 in patients with NAFLD<sup>70</sup>. Large randomized controlled clinical trials have reported that the  
578 *PPARG* agonists rosiglitazone and pioglitazone improve NAFLD-related hepatic steatosis,  
579 hepatic inflammation, and fibrosis<sup>71-75</sup>. However, the treatment is frequently accompanied with  
580 weight gain and fluid retention, limiting its application and potential long-term drug adherence.  
581 ROR $\alpha$  however, competes with PPAR $\gamma$  for binding to PPAR $\gamma$  target promoters, and therapeutic  
582 strategies designed to modulate ROR $\alpha$  activity in conjunction with PPAR $\gamma$  may be beneficial for  
583 the treatment of NAFLD. ApoE and ApoH<sup>59</sup> play an important role in the production and  
584 clearance of VLDL by facilitating the hepatic uptake of triglyceride-rich lipoproteins<sup>76-79</sup>. ApoE  
585 deficiency is suggested to affect hepatic lipid deposition in dietary-challenged murine models<sup>80</sup>.  
586 Similarly, a Western high-fat cholesterol-rich diet accelerates the formation of NASH with  
587 fibrosis in ApoE-deficient mice<sup>81</sup>.

588 More than half of our cALT loci had a significant association with at least one  
589 inflammatory trait (**Figure 4**), consistent with the multiple-hit hypothesis of NAFLD<sup>82</sup>. For  
590 example, the transcription factor MafB regulates macrophage differentiation<sup>83</sup> and genetic  
591 variation in *MAFB* has been associated with hyperlipidemia and hypercholesterolemia<sup>27</sup>. Mice  
592 with macrophage-specific *Mafb*-deficiency are more susceptible to obesity and

593 atherosclerosis<sup>84,85</sup>. *FADS1* and *FADS2* are markedly induced during monocyte to macrophage  
594 differentiation, and it is hypothesized that they impact metabolic disease by balancing  
595 proinflammatory and proresolving lipid mediators<sup>86,87</sup>. Another interesting locus is *IL1RN*, which  
596 in our study is associated with lower risk of cALT and liver-biopsy characterized NAFLD. GTEx  
597 data shows heterogeneous directions of effect across various tissues, with the minor G-allele  
598 being associated with increased *IL1RN* expression in liver but decreased expression in  
599 subcutaneous adipose tissue. *IL1RN* encodes the anti-inflammatory cytokine interleukin-1  
600 receptor antagonist (IL-1Ra) and is a natural inhibitor of IL-1 activity by blocking the binding of  
601 IL-1 $\beta$  to IL-1R, and is considered a potential therapeutic target for NAFLD treatment<sup>88</sup>. IL-1 $\beta$  has  
602 been shown to lead to chronic low-grade inflammation<sup>89-91</sup>, insulin resistance and hepatic fat,  
603 and promotes hepatic steatosis, inflammation and fibrosis<sup>92,93</sup>. A study in mice has shown that  
604 IL-1R-deficiency protects from liver fibrosis<sup>94</sup>, and the deletion of IL-1R reduces liver injury in  
605 acute liver disease by blocking IL-1 driven autoinflammation<sup>95</sup>. In two studies of patients with  
606 diabetes, blockade of IL-1 signaling with Anakinra (a recombinant form of IL-1Ra) improved  
607 glycemic control<sup>96-98</sup>. It remains to be investigated whether remodeling of the adipose tissue  
608 inflammasome via IL-1 signaling blockade in obesity-associated NAFLD offers potential  
609 therapeutic benefit. Other loci implicated with inflammatory traits include *RORA*<sup>99,100</sup>,  
610 *IFI30*<sup>101,102</sup>, *CD276*<sup>103-105</sup>, *FCGR2A*<sup>106</sup>, and *P2RX7*<sup>107-109</sup>. Interestingly, these inflammation-related  
611 genes and pathways emerged from our cALT GWAS despite the indirect assessment of our  
612 phenotype, clearly implicating inflammation early in NAFLD.

613 Finally, *PANX1* and *MERTK* genes that are associated with liver traits only seem  
614 particularly interesting. For *PANX1*, the directional concordance of effects between cALT and

615 *PANX1* gene expression in the liver suggests possible relevance as a therapeutic target. It has  
616 been reported that the genetic deletion of Pannexin 1 (encoded by *PANX1*) has a protective  
617 effect in a mouse model of acute and chronic liver disease<sup>110,111</sup>, and our data demonstrate that  
618 a SNP near *PANX1* was associated with reduced *PANX1* expression and reduced risk of NAFLD.  
619 These data nominate *PANX1* as a therapeutic target for silencing in NAFLD treatment. For  
620 MerTK, two missense variants (Arg466Lys and Ile518Val,  $r^2=0.98$ ) were predicted to affect  
621 protein function. MerTK signaling in hepatic macrophages was recently shown to mediate  
622 hepatic stellate cell activation and promote hepatic fibrosis progression<sup>112</sup>. Variants in *MERTK*  
623 were associated with liver fibrosis progression in HCV-infected patients<sup>113</sup>, raising the possibility  
624 for MerTK as a novel therapeutic target against fibrosis<sup>114</sup>. We emphasize that functional  
625 studies of our nominated causal genes are needed to demonstrate casual relevance, their  
626 impact on hepatosteatosis, and ultimately to determine their underlying mechanisms.

627 In conclusion, we discovered 77 genomic loci associated with cALT in a large, ancestrally  
628 diverse cohort. Our cases of cALT were excluded for other known causes of liver disease or  
629 elevated ALT and, not surprisingly, were substantially enriched for metabolic disorders. We  
630 replicated our findings in external cohorts with hepatic fat defined by liver biopsy or radiologic  
631 imaging. The genetic architecture of the lead loci indicate a predominant involvement of  
632 metabolic and inflammatory pathways. This study constitutes a much-needed large-scale,  
633 multi-ancestry genetic resource that can be used to build genetic prediction models, identify  
634 causal mechanisms, and understand biological pathways contributing to NAFLD initiation and  
635 disease progression.

636

637 **Table 1a. Gene nominations at loci with strongest evidence for coding variants.**

| SNP         | Position     | Gene     | AA-Change    | SIFT/PP2* | e/sQTL** | Other† | Pleiotropy‡ |
|-------------|--------------|----------|--------------|-----------|----------|--------|-------------|
| rs6541349   | 1:93787867   | CCDC18   | p.Leu1134Val | +/-       | +        | .      | M           |
| rs2642438   | 1:220970028  | MTARC1   | p.Thr165Ala  | -/-       | +(A)     | +      | M           |
| rs11683409  | 2:112770134  | MERTK    | p.Arg466Lys  | -/-       | .        | ++     | .           |
| rs17036160  | 3:12329783   | PPARG    | p.Pro12Ala   | -/-       | +        | ++     | M           |
| rs17598226  | 4:100496891  | MTTP     | p.Ile128Thr  | -/-       | +        | +      | .           |
| rs115038698 | 7:87024718   | ABCB4    | p.Ala934Thr  | +/+       | +        | +      | M,I         |
| rs799165    | 7:73052057   | MLXIPL   | p.Gln241His  | -/+       | +        | +      | M,I         |
|             |              |          | p.Ala358Val  | -/-       | +        | +      | M,I         |
| rs7041363   | 9:117146043  | AKNA     | p.Pro624Leu  | +/-       | +        | +      | M           |
| rs10883451  | 10:101924418 | ERLIN1   | p.Ile291Val  | -/-       | .        | ++     | M           |
| rs4918722   | 10:113947040 | GPAM     | p.Ile43Val   | -/-       | +        | ++     | M           |
| rs11601507  | 11:5701074   | TRIM5    | p.Val112Phe  | -/-       | .        | ++     | M,I         |
| rs1626329   | 12:121622023 | P2RX7    | p.Ala348Thr  | -/-       | +        | +      | .           |
| rs11621792  | 14:24871926  | NYNRIN   | p.Ala978Thr  | -/-       | +(L,A)   | +      | M,I         |
| rs28929474  | 14:94844947  | SERPINA1 | p.Glu366Lys  | -/+       | .        | +++    | M,I         |
| rs7168849   | 15:90346227  | ANPEP    | p.Ala311Val  | -/-       | +(L)     | +      | .           |
| rs1801689   | 17:64210580  | APOH     | p.Cys325Gly  | +/+       | .        | ++     | M,I         |
| rs132665    | 22:36564170  | APOL3    | p.Ser39Arg   | -/-       | +(A)     | +      | .           |
| rs738408    | 22:44324730  | PNPLA3   | p.Ile148Met  | +/+       | .        | +++    | M,I         |

638 Genes nominated with various sources of evidence are listed as follows.

639 \*Prio to the slash symbol: '+' indicates 'deleterious' in SIFT and '-' otherwise. After slash symbol: '+'  
 640 denotes probably damaging in Polyphen-2 and '-' otherwise.

641 \*\* The '+' indicates colocalization between NAFLD GWAS variant and GTEx QTL varint (COLOC  
 642 PP4/(PP3+PP4) > 0.9). (L) denotes QTL effect in Liver, (A) denotes QTL in Adipose.

643 †Each '+' represent evidence from DEPICT, PPI data, or if the lead SNP is within the transcript; coding  
 644 variants also include '+' from hQTLs/Capture-C evidence.

645 ‡Pleiotropy is limited to association with Metabolic (M) or Inflammatory (I) Traits

646

647

648 **Table 1b. Gene nominations at loci with strongest evidence for non-coding variants.**

| SNP        | Position     | Gene     | hQTL | CaptureC | e/sQTL** | Other <sup>†</sup> | Pleiotropy <sup>‡</sup> |
|------------|--------------|----------|------|----------|----------|--------------------|-------------------------|
| rs36086195 | 1:16510894   | EPHA2    | .    | +        | +(L,A)   | +                  | M                       |
| rs6734238  | 2:113841030  | IL1RN    | .    | +        | +(A)     | ++                 | I                       |
| rs10201587 | 2:202202791  | CASP8    | .    | +        | +        | +                  | M                       |
| rs11683367 | 2:233510011  | EFHD1    | +    | .        | +(L)     | +                  | .                       |
| rs61791108 | 3:170732742  | SLC2A2   | .    | +        | .        | +++                | M                       |
| rs7653249  | 3:136005792  | PCCB     | .    | .        | +        | ++                 | M,I                     |
| rs12500824 | 4:77416627   | SHROOM3  | .    | +        | +(L)     | +                  | M                       |
| rs10433937 | 4:88230100   | HSD17B13 | .    | .        | +(L,A)   | +                  | M,I                     |
| rs799165   | 7:73052057   | BCL7B    | .    | +        | +        | +                  | M,I                     |
| rs687621   | 9:136137065  | ABO      | .    | .        | +        | +                  | M,I                     |
| rs35199395 | 10:70983936  | HKDC1    | .    | +        | +(L,A)   | +                  | M                       |
| rs174535   | 11:61551356  | FADS2    | +    | .        | +(A)     | ++                 | M,I                     |
| rs56175344 | 11:93864393  | PANX1    | .    | .        | +(L,A)   | ++                 | .                       |
| rs34123446 | 12:122511238 | MLXIP    | .    | +        | +        | +                  | M,I                     |
| rs12149380 | 16:72043546  | DHODH    | .    | +        | +        | +                  | M,I                     |
|            |              | HP       | .    | +        | +(A)     | .                  | M,I                     |
| rs2727324  | 17:61922102  | DDX42    | .    | +        | +        | +                  | M                       |
|            |              | SMARCD2  | .    | .        | +        | +                  | M                       |
| rs5117     | 19:45418790  | APOC1    | .    | .        | +        | ++                 | M,I                     |

649 Genes nominated with various sources of evidence are listed as follows.

650 \*Prio to the slash symbol: '+' indicates 'deleterious' in SIFT and '-' otherwise. After slash symbol: '+'  
 651 denotes probably damaging in Polyphen-2 and '-' otherwise.

652 \*\* The '+' indicates colocalization between NAFLD GWAS variant and GTEx QTL varint (COLOC  
 653 PP4/(PP3+PP4) > 0.9). (L) denotes QTL effect in Liver, (A) denotes QTL in Adipose.

654 †Each '+' represent evidence from DEPICT, PPI data, or if the lead SNP is within the transcript; coding  
 655 variants also include '+' from hQTLs/Capture-C evidence.

656 ‡Pleiotropy is limited to association with Metabolic (M) or Inflammatory (I) Traits

657

658

659 **Figure 1. Overview of analysis pipeline.**

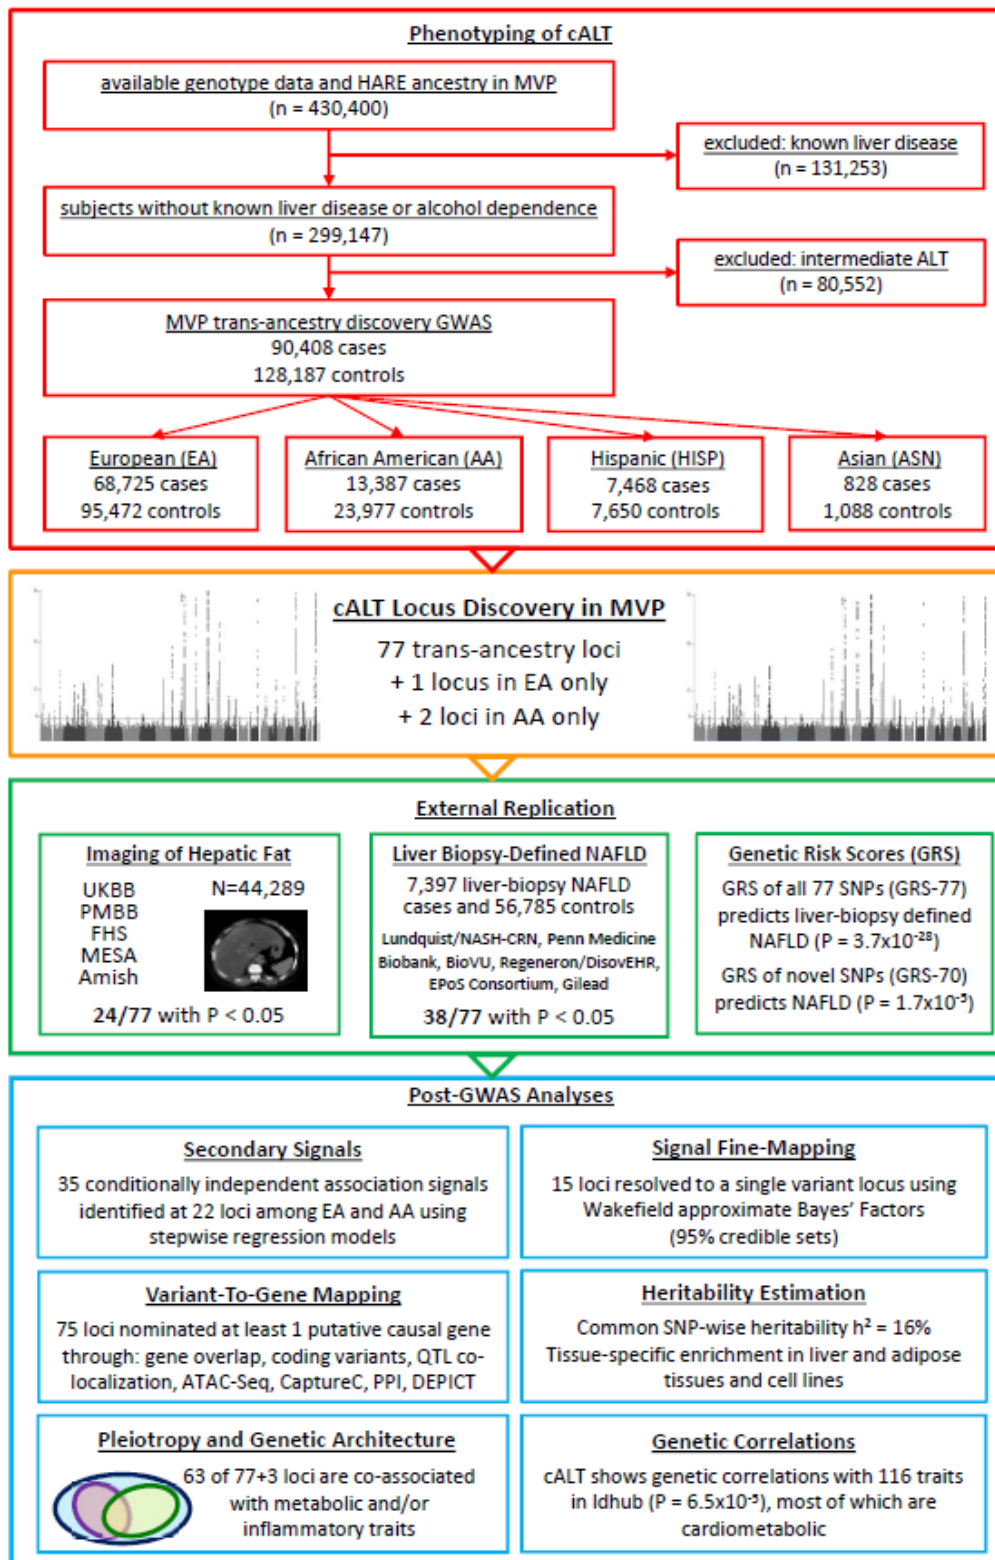

660

661 The flow diagram shows in the red box our study design with initial inclusion of 430,400 Million Veteran Program  
662 participants with genotyping and ancestry classification by HARE, exclusion of individuals with known liver disease  
663 or alcohol dependence and inclusion of subjects based on chronic ALT elevation (case) or normal ALT (control).  
664 This resulted in 90,408 NAFLD cases and 128,187 controls with EA, AA, HISP and ASN ancestries that were  
665 examined in primary trans-ancestry and ancestry-specific genome-wide association scans. The orange box of the  
666 flow diagram highlights our results of trans-ancestry and ancestry-specific meta-analyses identifying 77 trans-  
667 ancestry loci + 1 EA-specific + 2 AA-specific loci that met genome-wide significance. The green box summarizes the  
668 results from external replication cohorts, whereas the blue box indicates all the post-GWAS annotation analyses  
669 that we performed, which include secondary signal analysis, fine-mapping (95% credible sets), (tissue-specific)  
670 heritability estimation, genetic correlations analysis, variant-to-gene mapping and pleiotropy analysis.  
671



672 Figure 2. Manhattan plot of NAFLD GWAS of 90,408 NAFLD and 128, 187 controls in trans-  
673 ancestry meta-analysis.

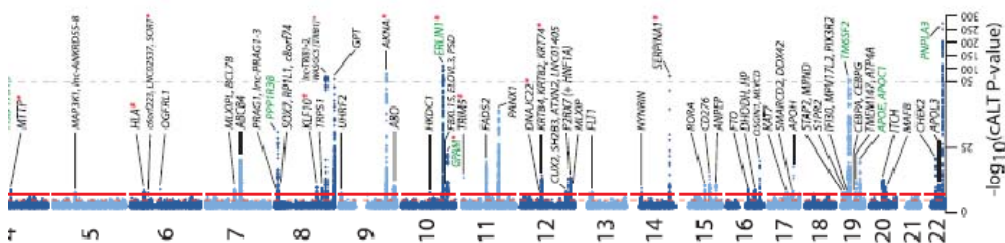

674  
675 Nominated genes are indicated for 77 loci reaching genome-wide significance ( $P < 5 \times 10^{-8}$ ). Previously reported  
676 NAFLD-loci with genome-wide significant association are indicated in green font. The red stars indicate the SNPs  
677 that have been validated with liver biopsy and/or radiologic imaging.



679 **Figure 3. Venn diagram depicting overlapping liver, metabolic and inflammatory traits among**  
 680 **NAFLD-associated loci.**

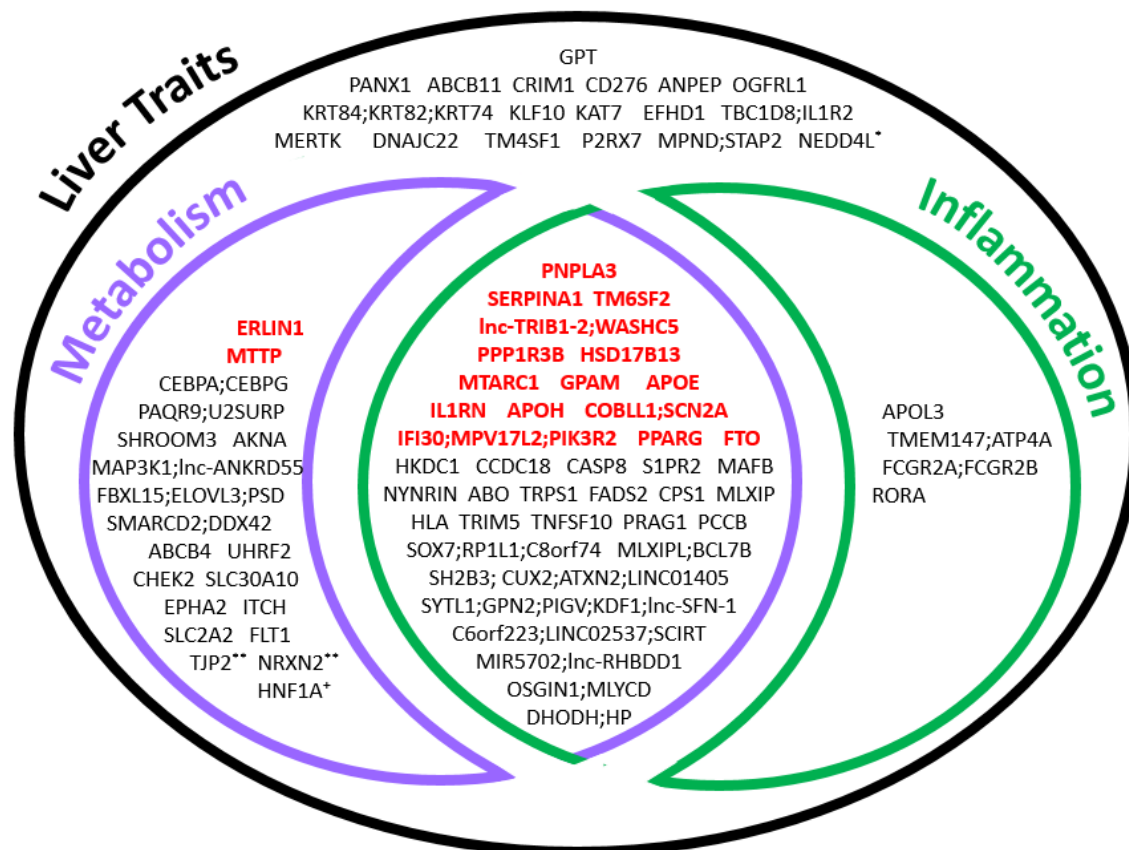

681  
 682 Overlapping liver (black), metabolic (purple) and/or inflammatory (green) traits are shown in  
 683 association with 77 trans-ancestry and additional ancestry-specific lead SNPs. The trait categorizations reflect  
 684 significant SNP-trait associations identified by: 1) LabWAS of clinical laboratory results in MVP; 2) PheWAS with  
 685 UKBB data using SAIGE; 3) SNP lookup using the curated data in the IEU OpenGWAS projects; and 4) cross-trait  
 686 colocalization analyses using COLOC of EA, AA and HISP lead loci with 36 other GWAS statistics of cardiometabolic  
 687 and blood cell related traits. Genes denoted in bold and color-coded in red refer to the loci also associated  
 688 with quantitative hepatic fat on imaging analyses or histologically characterized NAFLD from liver biopsies. \* Locus  
 689 identified in European-only GWAS. \*\* Locus identified in African American-restricted analysis. \*Secondary signal  
 690 from European analysis (e.g. HNF1A/P2RX7).  
 691

692 **Figure 4: Seven gene clusters with distinct biomarker association profiles.**

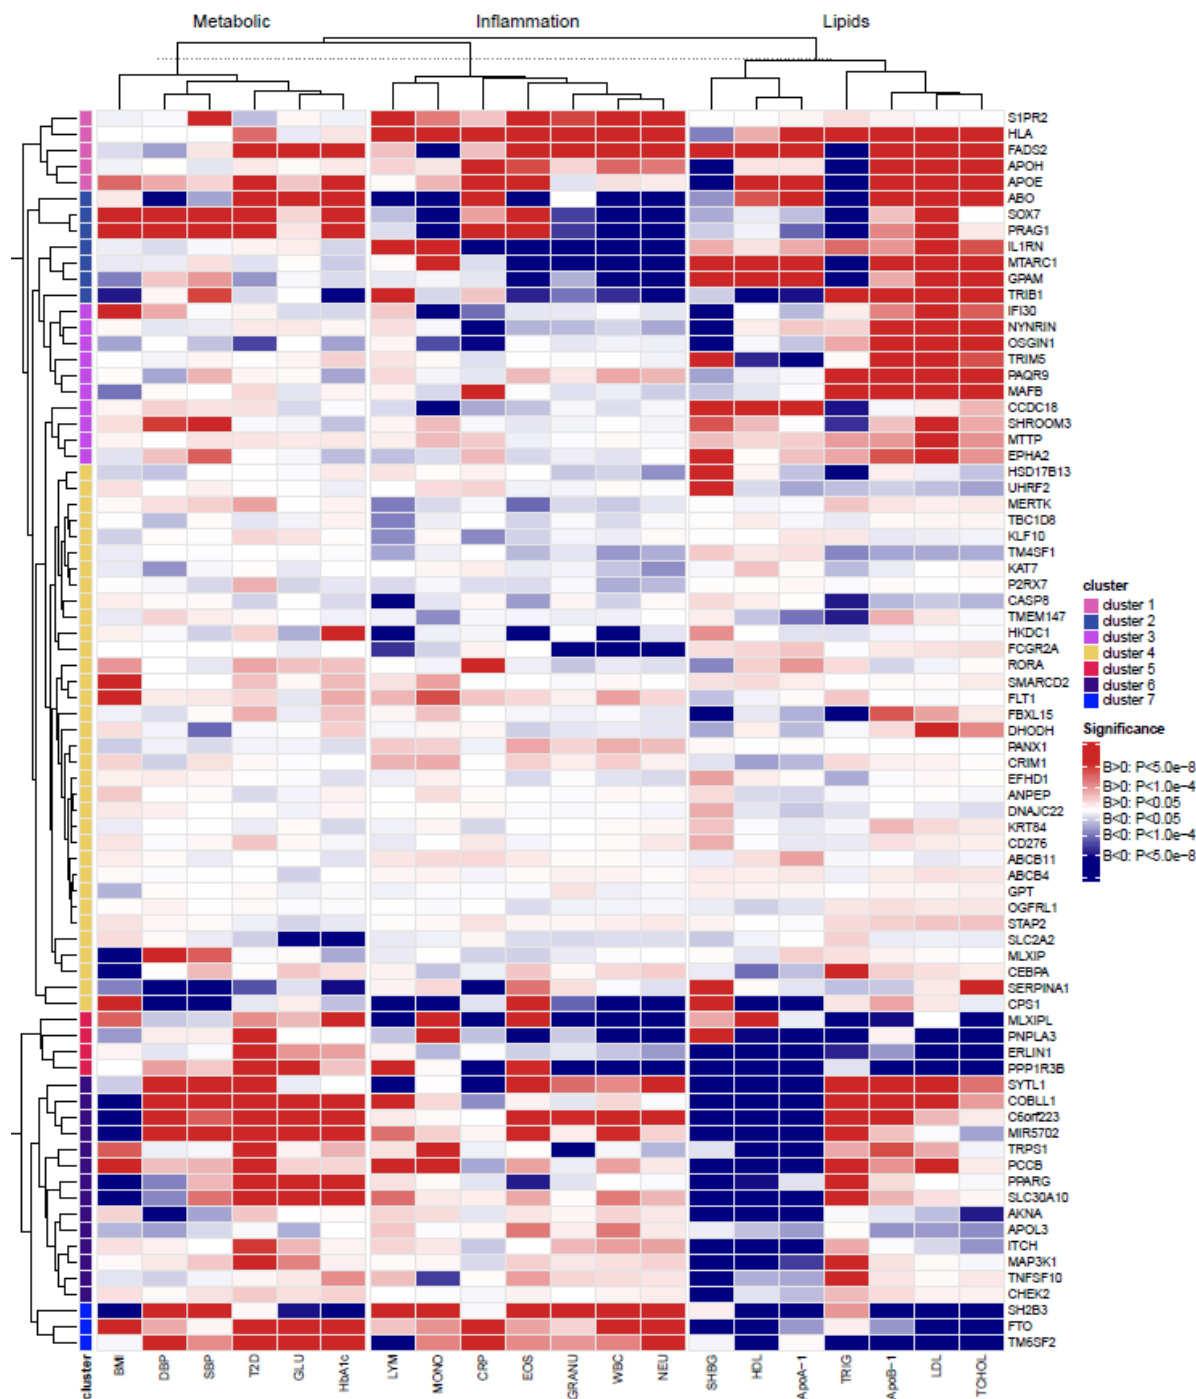

693  
 694 The 77 loci cluster along 7 groups using stratified linkage hierarchical clustering. Each cluster has a distinct  
 695 biomarker association profile, which is visualized with a heatmap. Twenty traits are clustered within their  
 696 biological strata (e.g. lipids, inflammation, and metabolic). The color coding corresponds to the direction of

697 association of the cALT risk allele (red, positive association; blue, negative association) and the strength of the  
698 association based on the P-value.

## 699 **Methods**

700 We performed a large-scale trans-ancestry NAFLD GWAS in the Million Veteran Program. We  
701 subsequently conducted analyses to facilitate the prioritization of these individual findings,  
702 including transcriptome-wide predicted gene expression, secondary signal analysis, coding  
703 variant mapping, variant-to-gene mapping, and pleiotropy analysis to fine-map the genomic loci  
704 to putatively causal genes and biological mechanisms.

705

### 706 *Discovery cohort in Million Veteran Program.*

707 The Million Veteran Program (MVP) is a mega-biobank that was launched in 2011 and  
708 supported entirely by the Veterans Health Administration (VA) Office of Research and  
709 Development in the United States (US) of America, to develop a genetic repository of US  
710 Veterans with additional information through the VA electronic health record system and MVP  
711 questionnaires to learn how genes, lifestyle and military exposure affect health and disease.  
712 The MVP received ethical and study protocol approval from the VA Central Institutional Review  
713 Board (IRB) in accordance with the principles outlined in the Declaration of Helsinki. Over 60 VA  
714 Medical Centers have participated in this study nationally. The specific design, initial  
715 demographics of the MVP have been detailed previously<sup>29</sup>. Electronic health record information  
716 from the VA's Corporate Data Warehouse (CDW) was used for clinical and demographic  
717 information. For genetic analyses, DNA extracted from whole blood was genotyped in  
718 customized Affymetrix Axiom Array which contains a total of 723,305 SNPs enriched for: 1) low

719 frequency variants in AA and HISP populations, and 2) variants associated with diseases  
720 common to the VA population<sup>29</sup>. Further quality control procedures have been previously  
721 described<sup>115</sup>.

722 Proxy NAFLD Phenotype: MVP NAFLD phenotype definitions were developed by combining a  
723 previously published VA CDW ALT-based approach with non-invasive clinical parameters  
724 available to practicing clinicians at the point of care<sup>21,31</sup>. The primary NAFLD phenotype  
725 (labeled “ALT-threshold”) was defined by: (i) elevated ALT >40 U/L for men or >30 U/L for  
726 women during at least two time points at least 6 months apart within a two-year window  
727 period at any point prior to enrollment and (ii) exclusion of other causes of liver disease (e.g.,  
728 presence of chronic viral hepatitis B or C (defined as positive hepatitis C RNA > 0 international  
729 units/mL or positive hepatitis B surface antigen), chronic liver diseases or systemic conditions  
730 (e.g., hemochromatosis, primary biliary cholangitis, primary sclerosing cholangitis, autoimmune  
731 hepatitis, alpha-1-antitrypsin deficiency, sarcoidosis, metastatic liver cancer, secondary biliary  
732 cirrhosis, Wilson’s disease), and/or alcohol use disorder (e.g., alcohol use disorder, alcoholic  
733 liver disease, alcoholic hepatitis and/or ascites, alcoholic fibrosis and sclerosis of liver, alcoholic  
734 cirrhosis of liver and/or ascites, alcoholic hepatic failure and/or coma, and unspecified alcoholic  
735 liver disease). The control group was defined by having a: normal ALT ( $\leq 30$  U/L for men,  $\leq 20$  U/L  
736 for women) and no apparent causes of liver disease or alcohol use disorder or related  
737 conditions<sup>21</sup>. Habitual alcohol consumption was assessed with the age-adjusted Alcohol Use  
738 Disorders Identification Test (AUDIT-C) score, a validated questionnaire annually administered  
739 by VA primary care practitioners and used previously in MVP<sup>116,117</sup>. Demographics of the NAFLD  
740 cohort are shown in **Supplementary Table 1**. The prevalence of cirrhosis and advanced fibrosis

741 was based on the following ICD-9 codes: 456.2, 456.21, 571.5, 572.2, 572.3 , and ICD-10 codes:

742 K72.9, K72.91, K74.0, K74.02, K74.1, K74.2, K74.6, K74.69

743

744

745 *Single-variant autosomal analyses.*

746 We tested imputed SNPs that passed quality control (i.e.  $HWE > 1 \times 10^{-10}$ ,  $INFO > 0.3$ , call rate  $>$   
747  $0.975$ ) for association with NAFLD through logistic regression assuming an additive model of  
748 variants with  $MAF > 0.1\%$  in European American (EA), and  $MAF > 1\%$  in African Americans (AA),  
749 Hispanic Americans (HISP), and Asian Americans (ASN) using PLINK2a software<sup>118</sup>. Indels were  
750 excluded from analysis. Covariates included age, gender, age-adjusted AUDIT-C score, and first  
751 10 principal components (PC's) of genetic ancestry. We aggregated association summary  
752 statistics from the ancestry-specific analyses and performed a trans-ancestry meta-analysis. The  
753 association summary statistics for each analysis were meta-analyzed in a fixed-effects model  
754 using METAL with inverse-variance weighting of log odds ratios<sup>119</sup>. Variants were clumped using  
755 a range of 500kb and/or CEU  $r^2 LD > 0.05$ , and were considered genome-wide significant if they  
756 passed the conventional p-value threshold of  $5 \times 10^{-8}$ . Trans-ancestry and ancestry-specific  
757 summary statistics are displayed in **Supplementary Tables 2-5**.

758

759 *Secondary signal analysis.*

760 The PLINK `--condition` and `--condition-list` parameters were used to conduct stepwise  
761 conditional analyses on individual level data in MVP to detect ancestry-specific distinct  
762 association signals nearby lead SNPs. Regional SNPs were eligible if they were located within  
763 500kb of lead SNP, had a  $MAF > 1\%$  and passed standard quality control criteria ( $INFO > 0.3$ ,  
764  $HWE P > 1.0 \times 10^{-10}$ , call rate  $> 0.975$ ). Logistic regression was performed in a stepwise fashion,  
765 starting with a regional association analysis with the following set of covariates: lead SNP  
766 imputed allele dosage, age, gender, and 10 PC's of genetic ancestry. If the corresponding



767 output file contained SNP(s) that reached locus-wide significance ( $P < 1.0 \times 10^{-5}$ ), the most  
768 significant SNP was selected and added to the covariate set. The regression was repeated until  
769 no locus-wide significant SNPs remained. Secondary signals are shown in **Supplementary Table**  
770 **11**.

771  
772 *Credible Sets.*

773 We calculated Wakefield's approximate Bayes' factors<sup>41</sup> based on the marginal summary  
774 statistics of the trans-ancestry meta-analysis and ancestry specific summary statistics using the  
775 CRAN R package `corrcoverage`<sup>120</sup>. For each locus, the posterior probabilities of each variant  
776 being causal were calculated and a 95% credible set was generated which contains the  
777 minimum set of variants that jointly have at least 95% posterior probability (PP) of including the  
778 causal variant (**Supplementary Tables 12-15**).

779  
780 *External validation in a Liver Imaging cohort.*

781 A replication lookup of lead loci was performed to evaluate the extent to which genetic  
782 predictors of hepatocellular injury (cALT) correspond with quantitative hepatic fat derived from  
783 computed tomography (CT) / magnetic resonance imaging (MRI)-measured hepatic fat in the  
784 Penn Medicine Biobank (PMBB), UK Biobank, Multi-Ethnic Study of Atherosclerosis (MESA),  
785 Framingham Heart Study (FHS), and University of Maryland Older Order Amish study  
786 (**Supplementary Table 8**). Attenuation was measured in Hounsfield units. The difference  
787 between the spleen and liver attenuation was measured for PMBB; a ratio between liver  
788 attenuation/spleen attenuation was used for MESA and Amish; and liver attenuation/phantom

789 attenuation ratio in FHS as previously described by Speliotes *et al*<sup>12</sup>. Abdominal MRI data from  
790 UK Biobank data were used to quantify liver fat using a two-stage machine learning approach  
791 with deep convolutional neural networks<sup>121</sup>. CT-measured hepatic fat was estimated using a  
792 multi-stage series of neural networks for presence of scan contrast and liver segmentation  
793 using convolutional neural networks. The PMBB included CT data on 2,979 EA and 1,250 AA  
794 participants<sup>122</sup>, the FHS included a total of 3,011 EA participants, the Amish study 754 EA  
795 participants, and MESA contributed 1,525 EA, 1,048 AA, 923 HISP, and 360 ASN participants for  
796 concordance analysis. The UK Biobank included MRI image data from 36,703 EA participants. All  
797 cohorts underwent individual-level linear regression analysis on hepatic fat, adjusted for the  
798 covariates of age, gender, first 10 principal components of genetic ancestry, and alcohol intake  
799 if available. If the lead SNP was not available in any of the studies, a proxy SNP in high LD with  
800 the lead variant was used ( $r^2 > 0.7$ ) or if no such variant was identified, the SNP was set to  
801 missing for that respective study. The study-specific ancestry-stratified summary statistics were  
802 first standardized to generate standard scores or normal deviates (z-scores), and then meta-  
803 analyzed using METAL in a fixed-effects model with inverse-variance weighting of regression  
804 coefficients<sup>119</sup>. In a first round of meta-analysis, ancestry-specific summary statistics were  
805 generated, which then served as input for a subsequent round of meta-analysis that represents  
806 the trans-ancestry effects of our lead SNPs on quantitative hepatic fat.

807

808 *External validation in a Liver Biopsy cohort*

809 Available data from the following groups contributed to the Liver Biopsy Cohort.

810 Non-Alcoholic Steatohepatitis Clinical Research Network (NASH CRN) studies with Hispanic  
811 Boys, FLINT, PIVENS and NASH Women Studies: Results from several studies of EA and HISP  
812 participants were included from the Lundquist Institute. The Hispanic American cases are  
813 derived from the NAFLD Pediatric Database I (NAFLD Peds DB1), a prospective, longitudinal,  
814 multicenter, observational study cohort of adults and children initiated in 2002 and contains  
815 over 4,400 subjects<sup>123</sup>. Clinical and histologic features of database participants have been  
816 described by Patton et al<sup>124</sup>. Biopsy specimens were reviewed and scored centrally by the Non-  
817 Alcoholic Steatohepatitis Clinical Research Network (NASH CRN) Pathology Committee  
818 according to the histology scoring system established by the NASH CRN<sup>125</sup>. Genotyping was  
819 performed using the Illumina HumanCNV370-Quadv3 BeadChip at the Medical Genetics  
820 Institute at Cedars–Sinai Medical Center (HumanCNV370-Quadv3 BeadChips; Illumina, San  
821 Diego, CA, USA). The Hispanic American controls from NASH-CRN are derived from the Long QT  
822 Screening (LQTS) study<sup>126</sup>. Saliva samples were used for genotyping with the Illumina  
823 HumanCore-24 BeadChips at the Institute for Translational Genomics and Population Sciences  
824 of the Lundquist Institute at Harbor-UCLA Medical Center. For all Hispanic American samples,  
825 SNP data were imputed to the 1000 Genomes Project phase 3 dataset version 5 (AMR  
826 population) on the Michigan imputation server. The final dataset consisted of 787 samples,  
827 including 208 cases from NASH Boys and 579 controls from LQTS, and the top 3 PCs were  
828 included in the association analysis. The NASH CRN database and clinical trials were reviewed  
829 and approved by the individual institutional review boards at each participating site. All  
830 participants signed an informed consent prior to their enrollment into these consents and their  
831 de-identified genetic data to be used for future liver disease research by the NASH CRN

832 investigators and by their collaborators. These studies have been monitored by an NIDDK-  
833 sponsored data safety and monitoring board.

834 The European American NAFLD samples from Lundquist Institute are derived from  
835 FLINT, PIVENS, and NASH women studies, and the controls are derived from the Cholesterol  
836 and Atherosclerosis Pharmacogenetics (CAP) trial. The details of the FLINT study have been  
837 published previously<sup>127</sup>. Liver histology was blindly and centrally assessed by the NASH Clinical  
838 Research Network (NASH CRN) Pathology Committee according to the NASH CRN system<sup>125</sup>. A  
839 total of 244 patients with available DNA were genotyped of whom 198 (81%) were White<sup>128</sup>.  
840 Genotyping was performed using the Omni2.5 content GWAS chip. The PIVENS study, a study of  
841 Pioglitazone versus Vitamin E versus Placebo in non-diabetic adults has been described  
842 previously<sup>71</sup>. Genotyping was performed on 432 PIVENS samples along with the FLINT samples  
843 using the Omni2.5 content GWAS chip. Subjects were removed for failed genotyping,  
844 unresolvable gender discrepancies, being outliers by principal component analyses, and by  
845 relatedness. In total, 197 White samples remained in the analysis dataset. The NASH Women  
846 study included a subset of patients who were into the NAFLD Database Study of NASH CRN  
847 whose liver biopsy specimens were reviewed and scored centrally by the NASH CRN Pathology  
848 Subcommittee. For the GWAS ancillary study<sup>22</sup> genotyping was performed at the Medical  
849 Genetics Institute at Cedars–Sinai Medical Center with the use of Infinium HD technology  
850 (HumanCNV370-QuadV3 BeadChips; Illumina, San Diego, CA). The controls for the European  
851 American analysis from Lundquist Institute are derived from the CAP trial involved 944 healthy  
852 volunteers, 609 of whom were Caucasian<sup>129</sup>. In total, 591 subjects were genotyped on the  
853 Illumina HumanHap300 BeadChip or Illumina HumanCNV610-Quad beadchip. Imputation was

854 performed using the Michigan Imputation Server with the reference panel of the Haplotype  
855 Reference Consortium (HRC) 1.1 release in 2016. After final QC of European American cohorts,  
856 the final 1,225 samples in the analysis including 650 cases and 575 controls, and the top 3 PCs  
857 for genetic ancestry were included in the association analysis.

858 EPoS Consortium Cohort: Results from EPoS consortium cohort were included from Newcastle  
859 University. A total 1,483 histologically characterized NAFLD cases were included and 17,781  
860 genetically matched controls, with the cases recruited into the European NAFLD Registry  
861 (ClinicalTrials.gov Identifier: NCT04442334) from clinics at several leading European tertiary  
862 liver centres<sup>20</sup>. Details of inclusion/exclusion criteria have previously been described<sup>20,130</sup>. All  
863 patients had undergone liver biopsy as part of the routine diagnostic workup for presumed  
864 NAFLD, and routinely assessed according to accepted criteria by experienced liver pathologists  
865 and scored using the well validated NIDDK NASH-CRN system<sup>125</sup>. Genotyping was performed  
866 using the Illumina OmniExpress BeadChip by Edinburgh Clinical Research Centre. The 17,781  
867 population controls were recruited from existing genome-wide genotype data: Wellcome Trust  
868 Case Control Consortium, (n=5,159) typed on the Illumina Human1.2M-Duo; the Hypergenes  
869 cohort (n=1,520) typed on the Illumina Human1M-Duo, KORA (n=1,835) genotyped on the  
870 Illumina HumanOmni2.5 Exome chip, and Understanding Societies (n=9,267) typed on the  
871 Illumina HumanCoreExome chip. Overlapping SNPs that were well genotyped in all case and  
872 control cohorts were imputed together to the Haplotype Resource Consortium panel (HRC 1.1r  
873 2016) by the Michigan Imputation Server.

874 The Geisinger Health System (GHS) bariatric surgery cohort: This consisted of 3,599 individuals  
875 of European American descent. Wedge biopsies of the liver were obtained intraoperatively

876 during bariatric surgery, and liver histology was conducted by an experienced pathologist and  
877 subsequently re-reviewed by a second experienced pathologist using the NASH CRN scoring  
878 system<sup>125</sup>. A total of 806 participants did not have NAFLD and were classified as controls,  
879 whereas 2,793 were histologically characterized as having NAFLD. DNA sample preparation and  
880 whole-exome sequencing were performed at the Regeneron Genetics Centre<sup>131</sup>. Exome capture  
881 was performed using NimbleGen probes according to the manufacturer's recommended  
882 protocol (Roche NimbleGen) multiplexed samples were sequenced on an Illumina v4 HiSeq  
883 2500. Raw sequence data from each run were uploaded to the DNAnexus platform for  
884 sequence read alignment and variant identification.

885 STELLAR-3 and ATLAS studies: Results from two trials from Gilead Sciences were included  
886 including phase 3 STELLAR-3 study (ClinicalTrials.gov Identifier: NCT03053050), and phase 2  
887 ATLAS study (ClinicalTrials.gov Identifier: NCT03449446) which were  
888 discontinued/terminated<sup>132</sup>. Genotyping was performed using whole genome sequencing  
889 (Illumina) aimed at 100x coverage. The PyVCF script was used to extract allele frequencies from  
890 VCF files generated using GATK4 pipeline with hg38 as reference genome.

891 BioVU Biorepository: BioVU subjects at Vanderbilt University underwent SNP genotyping using  
892 the Illumina Infinium Multi-Ethnic Genotyping Array (MEGAEX) platform and underwent QC  
893 analyses and imputation as previously described<sup>133</sup>. Genetic data for were imputed using the  
894 Michigan Imputation Server (HRC v1.1) and genotyping data was linked to de-identified EHR  
895 data. All available lab measurements in this cohort that occurred when the subject was at least  
896 18 years of age. BioVU participants were selected based on available pathology report for liver  
897 biopsy in the note table in Observational Medical Outcomes Partnership (OMOP), excluding

898 those with other conflicting diagnoses (e.g. viral hepatitis, alcohol, transplant, explant). NAFLD  
899 was defined based on pathology report defining hepatic fat as mild, moderate, severe, 5% or  
900 more.

901  
902 Control subjects within BloVU were identified by selecting those with ALT levels below 30 for  
903 males and below 20 for females. Both cases and controls were excluded for alcohol use  
904 disorders using ICD-9 and -10 codes.

905  
906 Penn Medicine Biobank (PMBB): The Penn Medicine Biobank includes participants recruited  
907 from the University of Pennsylvania Health System. A total of 139 biopsy proven NAFLD cases  
908 were selected using Linguamatics natural language processing on biopsy protocols of the PENN  
909 EHR. Cases were then linked to the PennMedicine BioBank. In addition, 1,995 PMBB  
910 participants were classified as controls if a recent CT scan of the liver was available, but no  
911 steatosis was present. Appropriate consent was obtained from each participant regarding  
912 storage of biological specimens, genetic sequencing, and access to all available EHR data. DNA  
913 extracted from the blood plasma of 2,134 samples were genotyped in three batches: the  
914 Illumina QuadOmni chip at the Regeneron Genetics Center; the Illumina GSA V1 chip OR on the  
915 Illumina GSA V2 chip by the Center for Applied Genomics at the Children's Hospital of  
916 Philadelphia. Genotypes for each of the three PMBB datasets were imputed to the 1000  
917 Genomes reference panel (1000G Phase3 v5) using the Michigan Imputation Server. Results  
918 from liver biopsy data are shown in **Supplemental Tables 6 and 7**.

919

920 *Heritability estimates and genetic correlations analysis.*

921 LD-score regression was used to estimate the heritability coefficient, and subsequently  
922 population and sample prevalence estimates were applied to estimate heritability on the  
923 liability scale<sup>134</sup>. A genome-wide genetic correlation analysis was performed to investigate  
924 possible co-regulation or a shared genetic basis between cALT and other complex traits and  
925 diseases (**Supplementary Table 9**). Pairwise genetic correlation coefficients were estimated  
926 between the meta-analyzed NAFLD GWAS summary output in EA and each of 774 precomputed  
927 and publicly available GWAS summary statistics for complex traits and diseases by using LD  
928 score regression through LD Hub v1.9.3 (<http://ldsc.broadinstitute.org>). Statistical significance  
929 was set to a Bonferroni-corrected level of  $P < 6.5 \times 10^{-5}$ .

930

931 *Tissue- and epigenetic-specific enrichment of NAFLD heritability.*

932 We analyzed cell type-specific annotations to identify enrichments of NAFLD heritability as  
933 shown in **Supplementary Table 16**. First, a baseline gene model was generated consisting of 53  
934 functional categories, including UCSC gene models, ENCODE functional annotations<sup>135</sup>,  
935 Roadmap epigenomic annotations<sup>136</sup>, and FANTOM5 enhancers<sup>137</sup>. Gene expression and  
936 chromatin data were also analyzed to identify disease-relevant tissues, cell types, and tissue-  
937 specific epigenetic annotations. We used LDSC<sup>37-39</sup> to test for enriched heritability in regions  
938 surrounding genes with the highest tissue-specific expression. Sources of data that were  
939 analyzed included 53 human tissue or cell type RNA-seq data from GTEx<sup>28</sup>; human, mouse, or  
940 rat tissue or cell type array data from the Franke lab<sup>138</sup>; 3 sets of mouse brain cell type array  
941 data from Cahoy *et al*<sup>139</sup>; 292 mouse immune cell type array data from ImmGen<sup>140</sup>; and 396



942 human epigenetic annotations from the Roadmap Epigenomics Consortium<sup>136</sup>. Expression  
943 profiles are considered statistically significantly enriched for cALT susceptibility if they pass the  
944 nominal P-value threshold of 0.003.

945

946 *Pathway Annotation enrichment.*

947 Enrichment analyses in DEPICT<sup>141</sup> were conducted using genome-wide significant ( $P < 5 \times 10^{-8}$ )  
948 NAFLD GWAS lead SNPs (**Supplementary Table 18**). DEPICT is based on predefined phenotypic  
949 gene sets from multiple databases and Affymetrix HGU133a2.0 expression microarray data  
950 from >37k subjects to build highly-expressed gene sets for Medical Subject Heading (MeSH)  
951 tissue and cell type annotations. Output includes a P-value for enrichment and a yes/no  
952 indicator of whether the FDR q-value is significant ( $P < 0.05$ ). Tissue and gene-set enrichment  
953 features are considered. We tested for epigenomic enrichment of genetic variants using  
954 GREGOR software (**Supplementary Table 19**)<sup>142</sup>. We selected EA-specific NAFLD lead variants  
955 with a p-value less than  $5 \times 10^{-8}$ . We tested for enrichment of the resulting GWAS lead variants  
956 or their LD proxies ( $r^2$  threshold of 0.8 within 1 Mb of the GWAS lead, 1000 Genomes Phase I) in  
957 genomic features including ENCODE, Epigenome Roadmap, and manually curated data  
958 (**Supplemental Table 20**). Enrichment was considered significant if the enrichment p-value was  
959 less than the Bonferroni-corrected threshold of  $P = 1.8 \times 10^{-5}$  ( $0.05/2,725$  tested features).

960

961 *Coding variant mapping.*

962 All imputed variants in MVP were evaluated with Ensemble variant effect predictor<sup>143</sup>, and all  
963 predicted LoF and missense variants were extracted. The LD was calculated with established

964 variants for trans-ancestry, EA, AA, and HISP lead SNPs based on 1000 Genomes reference  
965 panel<sup>144</sup>. For SNPs with low allele frequencies, the MVP dataset was used for LD calculation for  
966 the respective underlying population. For the trans-ancestry coding variants, the EA panel was  
967 used for LD calculation. Coding variants that were in strong LD ( $r^2 > 0.7$ ) with lead SNPs and had  
968 a strong statistical association ( $P\text{-value} < 1 \times 10^{-5}$ ) were considered the putative causal drivers of  
969 the observed association at the respective locus (**Supplementary Table 22**).

970

971

972

973 *Colocalization with gene expression*

974 GWAS summary statistics were lifted over from GRCh37 to GRCh38 using LiftOver  
975 (<https://genome.ucsc.edu/cgi-bin/hgLiftOver>). Colocalization analysis was run separately for  
976 eQTLs and sQTLs for each of the 49 tissues in GTEx v8 (**Supplementary Tables 23 and 24**)<sup>28</sup>. For  
977 each tissue, we obtained an LD block for the genome with a sentinel SNP at  $P < 5 \times 10^{-8}$ , and then  
978 restricted analysis to the LD blocks. For each LD block with a sentinel SNP, all genes within 1Mb  
979 of the sentinel SNP (cis-Genes) were identified, and then restricted to those that were  
980 identified as eGenes in GTEx v8 at an FDR threshold of 0.05 (cis-eGenes). For each cis-eGene,  
981 we performed colocalization using all variants within 1Mb of the gene using the default prior  
982 probabilities in the 'coloc' function for the coloc package in R. We first assessed each coloc  
983 result for whether there was sufficient power to test for colocalization ( $PP3+PP4>0.8$ ), and for  
984 the colocalization pairs that pass the power threshold, we defined the significant colocalization  
985 threshold as  $PP4/(PP3+PP4)>0.9$ .

986

987 *Overlap with open chromatin.*

988 At each of the 77 NAFLD-associated loci from the trans-ancestry meta-analysis, we looked for  
989 overlaps between any variant in the credible set, and regions of open chromatin previously  
990 identified using ATAC-Seq experiments in two cell types—3 biological replicates of HepG2<sup>145</sup>  
991 and 3 biological replicates of hepatocyte-like cells (HLC)<sup>146</sup> produced by differentiating three  
992 biological replicates of iPSCs, which in turn were generated from peripheral blood mononuclear  
993 cells using a previously published protocol<sup>44</sup>. Results are shown in **Supplementary Table 25**.

994

995 *Overlap with Promoter Capture-C data.*

996 We used two promoter Capture-C datasets from two cell/tissue types to capture physical  
997 interactions between gene promoters and their regulatory elements and genes; three biological  
998 replicates of HepG2 liver carcinoma cells, and hepatocyte-like cells (HLC)<sup>145</sup>. The detailed  
999 protocol to prepare HepG2 or HLC cells for the promoter Capture-C experiment is previously  
1000 described<sup>44</sup>. Briefly, for each dataset, 10 million cells were used for promoter Capture-C library  
1001 generation. Custom capture baits were designed using an Agilent SureSelect library design  
1002 targeting both ends of DpnII restriction fragments encompassing promoters (including  
1003 alternative promoters) of all human coding genes, noncoding RNA, antisense RNA, snRNA,  
1004 miRNA, snoRNA, and lincRNA transcripts, totaling 36,691 RNA baited fragments. Each library  
1005 was then sequenced on an Illumina NovoSeq (HLC), or Illumina HiSeq 4000 (HLC), generating  
1006 1.6 billion read pairs per sample (50 base pair read length.) HiCUP<sup>147</sup> was used to process the  
1007 raw FastQ files into loop calls; we then used CHiCAGO<sup>148</sup> to define significant looping

1008 interactions; a default score of 5 was defined as significant. We identified those NAFLD loci at  
1009 which at least one variant in the credible set interacted with an annotated bait in the Capture-C  
1010 data (**Supplementary Table 25**).

1011  
1012 *Protein-Protein Interaction Network Analysis*  
1013 We employed the search tool for retrieval of interacting genes (STRING) v11<sup>149</sup> ([https://string-](https://string-db.org)  
1014 [db.org](https://string-db.org)) to seek potential interactions between nominated genes. STRING integrates both  
1015 known and predicted PPIs and can be applied to predict functional interactions of proteins. In  
1016 our study, the sources for interaction were restricted to the ‘Homo Sapiens’ species and limited  
1017 to experimentally validated and curated databases. An interaction score  $\geq 0.4$  were applied to  
1018 construct the PPI networks, in which the nodes correspond to the proteins and the edges  
1019 represent the interactions (**Figure 4, Supplemental Table 26**).

1020  
1021 *Ensemble variant-to-gene mapping to identify putative causal genes.*  
1022 Based on DEPICT gene prediction, coding variant linkage analysis, QTL analysis, and annotation  
1023 enrichment, and PPI networks (**Supplemental Tables 18-26**), a total of 215 potentially relevant  
1024 genes for NAFLD were mapped to trans-ancestry 77 loci. For each locus, we counted how many  
1025 times each gene in that region was identified in the 8 analyses. We then divided this number by  
1026 the total number of experiments (i.e., 8) to calculate an evidence burden (called nomination  
1027 score) that ranges from 0 to 100%. For each genomic locus, the gene that was most frequently  
1028 identified as a causal gene was selected as the putative causal gene for that locus. In the case of  
1029 a tie break, and if the respective genes have identical nomination profiles, the gene with eQTLs

1030 in multiple tissues was selected as the putative causal gene. Similarly, gene nomination was  
1031 preferred for loci that strongly tagged ( $r^2 > 0.8$ ) a coding variant. Loci that scored with 3 distinct  
1032 sources of evidence or greater are listed for coding variant (**Table 1A**) and non-coding variants  
1033 (**Table 1B**), respectively.

1034

1035 *MVP LabWAS.*

1036 A total of 21 continuous traits in the discovery MVP dataset, e.g. AST, ALP, fasting TG, HDL, LDL,  
1037 TC, random glucose, HbA1c, albumin, bilirubin, platelet count, BMI, blood urea nitrogen (BUN),  
1038 creatinine, eGFR, SBP, DBP, ESR, INR, and C-reactive protein were tested in 186,681 EA's with  
1039 association of 77 SNPs using linear regression of log-linear values. Covariates included age,  
1040 gender and the first 10 PC's of EA ancestry (**Supplementary Table 29**). The Bonferonni p-value  
1041 threshold is set at  $3.09 \times 10^{-05}$  ( $0.05 / 21 \text{ traits} * 77 \text{ SNPs}$ )

1042

1043 *PheWAS with UK Biobank data.*

1044 For the 77 lead trans-ancestry SNPs and EA and AA specific SNPs, we performed a PheWAS in a  
1045 genome-wide association study of EHR-derived ICD billing codes from the White British  
1046 participants of the UK Biobank using PheWeb<sup>150</sup>. In short, phenotypes were classified into 1,403  
1047 PheWAS codes excluding SNP-PheWAS code association pairs with case counts less than fifty<sup>151</sup>.  
1048 All individuals were imputed using the Haplotype Reference Consortium panel<sup>152</sup>, resulting in  
1049 the availability of 28 million genetic variants for a total of 408,961 subjects. Analyses on binary  
1050 outcomes were conducted using a model named SAIGE, adjusted for genetic relatedness,  
1051 gender, year of birth and the first 4 PC's of white British genetic ancestry<sup>153</sup>. SAIGE stands for

1052 Scalable and Accurate Implementation of GEneralized mixed model and represents a  
1053 generalized mixed-model association test that accounts for case-control imbalance and sample  
1054 relatedness<sup>153</sup>. Results are shown in **Supplemental Tables 30 and 31**. SNP-trait associations are  
1055 listed if they passed a nominal significance threshold of  $P < 0.001$ , and are considered Bonferoni  
1056 significant when  $P < 4.6 \times 10^{-7}$  ( $0.05 / 77 \text{ SNPs} * 1,403 \text{ traits}$ ).

1057

1058 *IEU OpenGWAS project SNP lookup.*

1059 An additional phenome-wide lookup was performed for 77 lead trans-ancestry SNPs and EA and  
1060 AA specific SNPs in Bristol University's MRC Integrative Epidemiology Unit (IEU) GWAS  
1061 database<sup>154</sup>. This database consists of 126,114,500,026 genetic associations from 34,494 GWAS  
1062 summary datasets, including UK Biobank (<http://www.nealelab.is/uk-biobank>), FinnGen  
1063 (<https://github.com/FINNGEN/pheweb>), Biobank Japan (<http://jenger.riken.jp/result>), the  
1064 NHGRI-EBI GWAS catalog (<https://www.ebi.ac.uk/gwas>), a large-scale blood metabolites  
1065 GWAS<sup>155</sup>, circulating metabolites GWAS<sup>156</sup>, the MR-Base manually curated database<sup>157</sup>, and a  
1066 protein level GWAS<sup>158</sup>. Results are shown in **Supplemental Table 32**.

1067

1068 *Regional cardiometabolic cross-trait colocalization.*

1069 Bayesian colocalization tests between NAFLD-associated signals and the following trait- and  
1070 disease-associated signals were performed using the COLOC R package<sup>159</sup>. To enable cross-trait  
1071 associations, we compiled summary statistics of 36 cardiometabolic and blood cell-related  
1072 quantitative traits and disease from GWAS studies conducted in EA ancestry individuals, and for  
1073 MVP-based reports also on AA and HISP. To summarize, for total, HDL, and LDL cholesterol,

1074 triglycerides, alcohol use disorder, alcohol intake, systolic blood pressure, diastolic blood  
1075 pressure, type 2 diabetes, BMI, CAD, we used the summary statistics available from various  
1076 MVP-based studies<sup>27,116,160</sup>. Of these, the summary statistics for CAD and BMI GWAS in MVP  
1077 have not been published or deposited as of yet. Data on WHR were derived from GIANT  
1078 Consortium<sup>161</sup>, whereas summary statistics on CKD, gout, blood urea nitrogen, urate, urinary  
1079 albumin-to-creatinine ratio, microalbuminuria, and eGFR were derived from CKD Genetics  
1080 Consortium<sup>162-164</sup>. Finally, summary statistics of blood cell traits (e.g. platelet count, albumin,  
1081 white blood cells, basophils, eosinophils, neutrophils, hemoglobin, hematocrit, immature  
1082 reticulocyte fraction, lymphocytes, monocytes, reticulocytes, mean corpuscular hemoglobin,  
1083 mean corpuscular volume, mean platelet volume, platelet distribution width, and red cell  
1084 distribution width) were derived from a large-scale GWAS report performed in UK Biobank and  
1085 INTERVAL studies<sup>165</sup>. A colocalization test was performed for all 77 NAFLD loci spanning 500kb  
1086 region around the lead SNP for all 36 compiled traits. For each association pair COLOC was run  
1087 with default parameters and priors. COLOC computed posterior probabilities for the following  
1088 five hypotheses: PP0, no association with trait 1 (cALT GWAS signal) or trait 2 (e.g., co-  
1089 associated metabolic signal); PP1, association with trait 1 only (i.e., no association with trait 2);  
1090 PP2, association with trait 2 only (i.e., no association with trait 1); PP3, association with trait 1  
1091 and trait 2 by two independent signals; and PP4, association with trait 1 and trait 2 by shared  
1092 variants. Evidence of colocalization<sup>166</sup> was defined by  $PP3 + PP4 \geq 0.99$  and  $PP4/PP3 \geq 5$ . Results  
1093 are shown in **Supplemental Table 33**.

1094

1095 *Genetic risk scores and histologically characterized NAFLD.*

1096 We constructed genetic risk scores (GRS) in 4 histologically characterized cohorts (e.g.  
1097 Lundquist Whites and Hispanic Americans, EPoS Consortium Whites, and BioVU Whites) by  
1098 calculating a linear combination of weights derived from the MVP dataset of lead 77 trans-  
1099 ancestry cALT variants that passed conventional genome-wide significance (GRS-77,  $P < 5.0 \times 10^{-8}$ ).  
1100 The GRS-77 was standardized and the risk of histologically characterized NAFLD was assessed  
1101 using a logistic regression model together with the potential confounding factors of age,  
1102 gender, and the first 3 to 5 principal components of ancestry. To delineate the potential driving  
1103 effects of known NAFLD loci, we divided the 77 loci into two sets, and generated one PRS  
1104 consisting of 9 known NAFLD SNPs only (GRS-9), and one of newly identified 68 cALT SNPs (GRS-  
1105 68). The goal of this separation is to evaluate whether a GRS based on novel SNPs alone (GRS-  
1106 68) showed predictive capability for biopsy-proven histologically characterized NAFLD. Both  
1107 GRS's were added as independent predictors in a logistic regression model to explain  
1108 histologically characterized NAFLD with the confounders of age, gender, and PC's of ancestry.  
1109 The individual effect sizes for each study were then meta-analyzed using the metagen package  
1110 in R with random effects model comparing the standardized mean difference (SMD, mean  
1111 differences divided by their respective standard deviations) (**Supplemental Table 9B**). A forest  
1112 plot was created to visualize the effect estimates between the studies (**Supplemental Figure**  
1113 **10**). In similar fashion, SNPs were divided into 3 groups according to replication power, where  
1114 SNPs were divided into a Bonferroni-replicated GRS consisting of 17 SNPs, a nominally  
1115 significant with directional concordance GRS with 25 SNPs, and non-replicated GRS with 35  
1116 SNPs (**Supplemental Table 9C, Supplemental Figure 11**). Finally, a GRS subset was created  
1117 based on the pleiotropy analysis and Venn Diagram, where we generated subset GRS that



1118 reflects liver+metabolic (17 SNPs), liver+metabolic+inflammation (38 SNPs), liver+inflammation  
1119 (5 SNPs), and liver only strata (17 SNPs) (**Supplemental Table 9D, Supplemental Figure 14**).

1120

1121 *Transcription Factor Analysis.*

1122 We identified nominated genes (**Supplemental Table 28**) that encode for TFs based on known  
1123 motifs, inferred motifs from similar proteins, and likely sequence specific TFs according to  
1124 literature or domain structure<sup>167</sup>. Target genes for these TFs were extracted using DoRothEA  
1125 database<sup>168</sup> in OmniPath collection<sup>169</sup> using the associated Bioconductor R package  
1126 OmnipathR<sup>170</sup>, a gene set resource containing TF-TF target interactions curated from public  
1127 literature resources, such as ChIP-seq peaks, TF binding site motifs and interactions inferred  
1128 directly from gene expression.

1129

1130 *Directional Pleiotropy and Gene Cluster Analysis.*

1131 We used the R package ‘pheatmap’ for a stratified agglomerative hierarchical clustering  
1132 method named ‘complete linkage’, where each element is its own cluster at the beginning, and  
1133 two clusters of the shortest distance in between them are sequentially combined into larger  
1134 clusters until all elements are included in one single cluster, where distance is measured in  
1135 Euclidean distance. We used the 77 lead SNPs and their corresponding single-trait effect  
1136 estimates for 20 traits corresponding to 3 biological super groups (e.g. lipids, inflammation,  
1137 metabolic) as input, with the sign of each cell determined by direction of effect, and the  
1138 strength by the  $-\log_{10}(\text{p-value})$ . The alleles were oriented as such that the cALT-increasing  
1139 allele was set to the effect allele, which allows for direct comparison of the various association

1140 profiles. We selected the default ‘complete’ method and ‘Euclidean’ distance options to  
1141 perform hierarchical clustering, stratified by the 3 super groups of metabolic, inflammation, and  
1142 lipid traits. The results of the clustering gene set are visualized with a dendrogram on the left  
1143 side of the heatmap, which is broadly grouped into 7 distinct gene clusters.

1144

#### 1145 **Acknowledgements**

1146 This research is based on data from the Million Veteran Program, Office of Research and  
1147 Development, Veterans Health Administration and was supported by award no. MVP000. This  
1148 publication does not represent the views of the Department of Veterans Affairs, the US Food  
1149 and Drug Administration, or the US Government. This research was also supported by funding  
1150 from: the Department of Veterans Affairs awards I01- BX003362 (P.S.T. and K.M.C) and  
1151 I01BX003341 (H.R.K. Co-Principal Investigator) and the VA Informatics and Computing  
1152 Infrastructure (VINCI) VA HSR RES 130457 (S.L.D). B.F.V. acknowledges support for this work  
1153 from the NIH/NIDDK (DK101478 and DK126194) and a Linda Pechenik Montague Investigator  
1154 award. K.M.C, S.M.D, J.M.G, C.J.O, L.S.P, and P.S.T. are supported by the VA Cooperative Studies  
1155 Program. S.M.D. is supported by the Veterans Administration [IK2 CX001780]. Funding support  
1156 is also acknowledged for M.S. (K23 DK115897), R.M.C (R01 AA026302), D.K. (National Heart,  
1157 Lung, and Blood Institute of the National Institutes of Health [T32 HL007734]), J.B.M  
1158 (R01HL151855, UM1DK078616), L.S.P. (VA awards I01 CX001025, and I01 CX001737, NIH  
1159 awards R21 DK099716, U01 DK091958, U01 DK098246, P30 DK111024, and R03 AI133172, and  
1160 a Cystic Fibrosis Foundation award PHILLI12A0). The Rader lab was supported by NIH grants  
1161 HL134853 (NJH and DJR) and DK114291-01A1 (K.T.C, N.J.H, and D.J.R). We thank all study

1162 participants for their contribution. Support for imaging studies was provided by ITMAT (NIH  
1163 NCATS UL1TR001878), the Penn Center for Precision Medicine Accelerator Fund and R01  
1164 HL137501. Data for external replication and hepatic fat concordance were provided by  
1165 investigators using United Kingdom BioBank, Multi-Ethnic Study of Atherosclerosis (MESA), Old  
1166 Order Amish Study (Amish), Framingham Heart Study (FHS) and Penn Medicine Biobank  
1167 (PMBB).

1168

1169 **MESA/MESA SHARe Acknowledgements:** MESA and the MESA SHARe projects are conducted  
1170 and supported by the National Heart, Lung, and Blood Institute (NHLBI) in collaboration with  
1171 MESA investigators. This research was supported by R01 HL071739 and MESA was supported  
1172 by contracts 75N92020D00001, HHSN268201500003I, N01-HC-95159, 75N92020D00005, N01-  
1173 HC-95160, 75N92020D00002, N01-HC-95161, 75N92020D00003, N01-HC-95162,  
1174 75N92020D00006, N01-HC-95163, 75N92020D00004, N01-HC-95164, 75N92020D00007, N01-  
1175 HC-95165, N01-HC-95166, N01-HC-95167, N01-HC-95168, N01-HC-95169, UL1-TR-000040, UL1-  
1176 TR-001079, UL1-TR-001420. Also supported in part by the National Center for Advancing  
1177 Translational Sciences, CTSI grant UL1TR001881, and the National Institute of Diabetes and  
1178 Digestive and Kidney Disease Diabetes Research Center (DRC) grant DK063491 to the Southern  
1179 California Diabetes Endocrinology Research Center.

1180

1181 **NASH-CRN Acknowledgements:** The NASH Boys study was supported by NIDDK (U01DK061734,  
1182 U01DK061718, U01DK061728, U01DK061731, U01DK061732, U01DK061737, U01DK061738,  
1183 U01DK061730, U01DK061713) and NICHD. It was also supported by NIH CTSA awards

1184 (UL1TR000040, UL1RR024989, UL1RR025761, M01RR00188, UL1RR024131, UL1RR025014,  
1185 UL1RR031990, UL1RR025741, UL1RR029887, UL1RR24156, UL1RR025055, UL1RR031980), and  
1186 DRC HDK063491. LQTS was supported by the National Institutes of Health (grant  
1187 5R42HL112435-04 to QT Medical, Inc.). The provision of genotyping data was supported in part  
1188 by the National Center for Advancing Translational Sciences, CTSI grant UL1TR001881, and the  
1189 National Institute of Diabetes and Digestive and Kidney Disease Diabetes Research Center (DRC)  
1190 grant DK063491 to the Southern California Diabetes Endocrinology Research Center. For LQTS:  
1191 QT Medical, Inc., was involved in the study design and collection of data. However, QT Medical,  
1192 Inc., had no involvement in the analysis and interpretation of the data, the drafting of the  
1193 article, or the decision to submit the article for publication. The FLINT trial was conducted by  
1194 the NASH CRN and supported in part by a Collaborative Research and Development Agreement  
1195 (CRADA) between NIDDK and Intercept Pharmaceuticals. The Nonalcoholic Steatohepatitis  
1196 Clinical Research Network (NASH CRN) is supported by the National Institute of Diabetes and  
1197 Digestive and Kidney Diseases (NIDDK) (grants U01DK061718, U01DK061728, U01DK061731,  
1198 U01DK061732, U01DK061734, U01DK061737, U01DK061738, U01DK061730, U01DK061713).  
1199 Additional support is received from the National Center for Advancing Translational Sciences  
1200 (NCATS) (grants UL1TR000439, UL1TR000436, UL1TR000006, UL1TR000448, UL1TR000100,  
1201 UL1TR000004, UL1TR000423, UL1TR000058). The PIVENS study was supported by grants from  
1202 the National Institutes of Health to the NASH Clinical Research Network (U01DK61718,  
1203 U01DK61728, U01DK61731, U01DK61732, U01DK61734, U01DK61737, U01DK61738,  
1204 U01DK61730, U01DK61713) and, in part, by the intramural program on the NIH, National  
1205 Cancer Institute. Other grant support includes the following National Institutes of Health

1206 General Clinical Research Centers or Clinical and Translational Science Awards: UL1RR024989,  
1207 UL1RR024128, M01RR000750, UL1RR024131, M01RR000827, UL1RR025014, M01RR000065.  
1208 Additional funding to conduct PIVENS trial was provided by Takeda Pharmaceuticals North  
1209 America, Inc. through a Cooperative Research and Development Agreement (CRADA) with the  
1210 National Institutes of Health. The vitamin E softgels and matching placebo were provided by  
1211 Pharmavite, LLC through a Clinical Trial Agreement with the National Institutes of Health. The  
1212 NASH women study was supported by U01DK061737 and K24DK069290 (N.C.), NCRR grant  
1213 M01-RR00425 to the Cedars-Sinai General Research Center Genotyping core, P30DK063491 to  
1214 J.R., and R01DK079888 to M.O.G. This work is supported in part by the American  
1215 Gastroenterological Association (AGA) Foundation, Sucampo, ASP Designated Research Award  
1216 in Geriatric Gastroenterology, and by a T. Franklin Williams Scholarship Award; Funding  
1217 provided by Atlantic Philanthropies, Inc, the John A. Hartford Foundation, the Association of  
1218 Specialty Professors, and the American Gastroenterological Association to R.L. This research  
1219 was funded in part with the support of the UCSD Digestive Diseases Research Development  
1220 Center, US PHS grant DK080506.

1221 The CAP study was supported by the National Institutes of Health: grant U19 HL069757 from  
1222 the National Heart, Lung, and Blood Institute; and grant UL1TR000124 from the National Center  
1223 for Advancing Translational Sciences.

1224  
1225 **EPoS Acknowledgements:** The EPoS genetics study and the European NAFLD Registry have  
1226 been supported by the EPoS (Elucidating Pathways of Steatohepatitis) consortium funded by  
1227 the European Union Horizon 2020 Framework Program of the European Union under Grant

1228 Agreement 634413, the FLIP (Fatty Liver: Inhibition of Progression) consortium funded by the  
1229 (European Union FP7 under grant agreement 241762), the LITMUS (Liver Investigation: Testing  
1230 Marker Utility in Steatohepatitis) consortium funded by the European Union Innovative  
1231 Medicines Initiative 2 Joint Undertaking that receives support from the European Union's  
1232 Horizon 2020 research and innovation programme and EFPIA under grant agreement 777377,  
1233 and the Newcastle NIHR Biomedical Research Centre.

1234

1235 **Gilead Acknowledgements:** The Stellar and Atlas were funded by Gilead Sciences, Inc.

1236

1237 **Regeneron Acknowledgements:** The Geisinger Health System bariatric-surgery biobank was  
1238 funded by Regeneron Pharmaceuticals and partly supported by a grant (P30DK072488) from  
1239 the Mid-Atlantic Nutrition Obesity Research Center by the National Institutes of Health (NIH).

1240

1241 **Penn Medicine Biobank Acknowledgements:** The Penn Medicine BioBank is funded by the  
1242 Perelman School of Medicine at the University of Pennsylvania and by a gift from the Smilow  
1243 family, and the National Center for Advancing Translational Sciences of the National Institutes  
1244 of Health under CTSA Award Number UL1TR001878."

1245

1246 **BioVU Acknowledgements:** The Vanderbilt University Medical Center's BioVU projects are  
1247 supported by institutional funding, private agencies, and federal grants, which include the NIH  
1248 funded Shared Instrumentation Grant S10OD017985 and S10RR025141; CTSA grants  
1249 UL1TR002243, UL1TR000445, and UL1RR024975; and investigator-led projects U01HG004798,

1250 R01NS032830, RC2GM092618, P50GM115305, U01HG006378, U19HL065962, R01HD074711;

1251 U01 HG004603; U01 HG006378.

1252

1253 **Ethics statement**

1254 The Central Veterans Affairs Institutional Review Board (IRB) and site-specific Research and

1255 Development Committees approved the Million Veteran Program study. All other cohorts

1256 participating in this meta-analysis have ethical approval from their local institutions. All relevant

1257 ethical regulations were followed.

1258

1259

1260 **Data availability**

1261 The full summary level association data from the trans-ancestry, European American, African

1262 American, Hispanic American, and Asian American meta-analysis from this report will be

1263 available through dbGAP (Accession codes will be available before publication).

1264

1265 **Disclosures**

1266 H.R.K. is a member of a Dicerna scientific advisory board; a member of the American Society of

1267 Clinical Psychopharmacology's Alcohol Clinical Trials Initiative, which during the past three

1268 years was supported by Alkermes, Amygdala Neurosciences, Arbor Pharmaceuticals, Dicerna,

1269 Ethypharm, Indivior, Lundbeck, Mitsubishi, and Otsuka; and is named as an inventor on PCT

1270 patent application #15/878,640 entitled: "Genotype-guided dosing of opioid agonists," filed

1271 January 24, 2018. D.G. is employed part-time by Novo Nordisk.

1272 **References**

- 1273 1. Asrani, S.K., Devarbhavi, H., Eaton, J. & Kamath, P.S. Burden of liver diseases in the world. *J*  
1274 *Hepatol* **70**, 151-171 (2019).
- 1275 2. Younossi, Z., Anstee, Q.M. & Marietti, M. Global burden of NAFLD and NASH: trends,  
1276 predictions, risk factors and prevention. *Nat Rev Gastroenterol Hepatol* **15**(2018).
- 1277 3. Carr, R.M., Oranu, A. & Khungar, V. Nonalcoholic Fatty Liver Disease: Pathophysiology and  
1278 Management. *Gastroenterol Clin North Am* **45**, 639-652 (2016).
- 1279 4. Chalasani, N. *et al.* The diagnosis and management of nonalcoholic fatty liver disease: Practice  
1280 guidance from the American Association for the Study of Liver Diseases. *Hepatology* **67**, 328-357  
1281 (2018).
- 1282 5. Friedman, S.L., Neuschwander-Tetri, B.A., Rinella, M. & Sanyal, A.J. Mechanisms of NAFLD  
1283 development and therapeutic strategies. *Nat Med* **24**, 908-922 (2018).
- 1284 6. Estes, C., Razavi, H., Loomba, R., Younossi, Z. & Sanyal, A.J. Modeling the epidemic of  
1285 nonalcoholic fatty liver disease demonstrates an exponential increase in burden of disease.  
1286 *Hepatology* **67**, 123-133 (2018).
- 1287 7. Sookoian, S. & Pirola, C.J. Genetic predisposition in nonalcoholic fatty liver disease. *Clin Mol*  
1288 *Hepatol* **23**, 1-12 (2017).
- 1289 8. Jarvis, H. *et al.* Metabolic risk factors and incident advanced liver disease in non-alcoholic fatty  
1290 liver disease (NAFLD): A systematic review and meta-analysis of population-based observational  
1291 studies. *PLoS Med* **17**, e1003100 (2020).
- 1292 9. Romeo, S. *et al.* Genetic variation in PNPLA3 confers susceptibility to nonalcoholic fatty liver  
1293 disease. *Nat Genet* **40**, 1461-5 (2008).
- 1294 10. Yuan, X. *et al.* Population-based genome-wide association studies reveal six loci influencing  
1295 plasma levels of liver enzymes. *Am J Hum Genet* **83**, 520-8 (2008).
- 1296 11. Chambers, J.C. *et al.* Genome-wide association study identifies loci influencing concentrations of  
1297 liver enzymes in plasma. *Nat Genet* **43**, 1131-8 (2011).
- 1298 12. Speliotes, E.K. *et al.* Genome-wide association analysis identifies variants associated with  
1299 nonalcoholic fatty liver disease that have distinct effects on metabolic traits. *PLoS Genet* **7**,  
1300 e1001324 (2011).
- 1301 13. Feitosa, M.F. *et al.* The ERLIN1-CHUK-CWF19L1 gene cluster influences liver fat deposition and  
1302 hepatic inflammation in the NHLBI Family Heart Study. *Atherosclerosis* **228**, 175-80 (2013).
- 1303 14. Kozlitina, J. *et al.* Exome-wide association study identifies a TM6SF2 variant that confers  
1304 susceptibility to nonalcoholic fatty liver disease. *Nat Genet* **46**, 352-6 (2014).
- 1305 15. Liu, Y.L. *et al.* TM6SF2 rs58542926 influences hepatic fibrosis progression in patients with non-  
1306 alcoholic fatty liver disease. *Nat Commun* **5**, 4309 (2014).
- 1307 16. Abul-Husn, N.S. *et al.* A Protein-Truncating HSD17B13 Variant and Protection from Chronic Liver  
1308 Disease. *N Engl J Med* **378**, 1096-1106 (2018).
- 1309 17. Young, K.A. *et al.* Genome-Wide Association Study Identifies Loci for Liver Enzyme  
1310 Concentrations in Mexican Americans: The GUARDIAN Consortium. *Obesity (Silver Spring)* **27**,  
1311 1331-1337 (2019).
- 1312 18. Namjou, B. *et al.* GWAS and enrichment analyses of non-alcoholic fatty liver disease identify  
1313 new trait-associated genes and pathways across eMERGE Network. *BMC Med* **17**, 135 (2019).
- 1314 19. Emdin, C.A. *et al.* A missense variant in Mitochondrial Amidoxime Reducing Component 1 gene  
1315 and protection against liver disease. *PLoS Genet* **16**, e1008629 (2020).
- 1316 20. Anstee, Q.M. *et al.* Genome-wide association study of non-alcoholic fatty liver and  
1317 steatohepatitis in a histologically characterised cohort(). *J Hepatol* **73**, 505-515 (2020).



- 1318 21. Serper, M. *et al.* Validating a Non-Invasive Non-Alcoholic Fatty Liver Phenotype in the Million  
1319 Veteran Program. *PLoS One* (**in press**)(2020).
- 1320 22. Chalasani, N. *et al.* Genome-wide association study identifies variants associated with histologic  
1321 features of nonalcoholic Fatty liver disease. *Gastroenterology* **139**, 1567-76, 1576 e1-6 (2010).
- 1322 23. Locke, A.E. *et al.* Genetic studies of body mass index yield new insights for obesity biology.  
1323 *Nature* **518**, 197-206 (2015).
- 1324 24. Yengo, L. *et al.* Meta-analysis of genome-wide association studies for height and body mass  
1325 index in approximately 700000 individuals of European ancestry. *Hum Mol Genet* **27**, 3641-3649  
1326 (2018).
- 1327 25. Vujkovic, M. *et al.* Discovery of 318 new risk loci for type 2 diabetes and related vascular  
1328 outcomes among 1.4 million participants in a multi-ancestry meta-analysis. *Nat Genet* **52**, 680-  
1329 691 (2020).
- 1330 26. Evangelou, E. *et al.* Genetic analysis of over 1 million people identifies 535 new loci associated  
1331 with blood pressure traits. *Nat Genet* **50**, 1412-1425 (2018).
- 1332 27. Klarin, D. *et al.* Genetics of blood lipids among ~300,000 multi-ethnic participants of the Million  
1333 Veteran Program. *Nat Genet* **50**, 1514-1523 (2018).
- 1334 28. Consortium, G.T. The Genotype-Tissue Expression (GTEx) project. *Nat Genet* **45**, 580-5 (2013).
- 1335 29. Gaziano, J.M. *et al.* Million Veteran Program: A mega-biobank to study genetic influences on  
1336 health and disease. *J Clin Epidemiol* **70**, 214-23 (2016).
- 1337 30. Hayward, K.L. *et al.* Detecting non-alcoholic fatty liver disease and risk factors in health  
1338 databases: accuracy and limitations of the ICD-10-AM. *BMJ Open Gastroenterol* **8**(2021).
- 1339 31. Husain, N. *et al.* Nonalcoholic fatty liver disease (NAFLD) in the Veterans Administration  
1340 population: development and validation of an algorithm for NAFLD using automated data.  
1341 *Aliment Pharmacol Ther* **40**, 949-54 (2014).
- 1342 32. Fang, H. *et al.* Harmonizing genetic ancestry and self-identified race/ethnicity in genome-wide  
1343 association studies. *Am J Hum Gen* **105**, 763-772 (2019).
- 1344 33. de Vries, P.S. *et al.* Multiancestry Genome-Wide Association Study of Lipid Levels Incorporating  
1345 Gene-Alcohol Interactions. *Am J Epidemiol* **188**, 1033-1054 (2019).
- 1346 34. Chen, V.L. *et al.* Genome-wide association study of serum liver enzymes implicates diverse  
1347 metabolic and liver pathology. *Nat Commun* **12**, 816 (2021).
- 1348 35. Pazoki, R. *et al.* Genetic analysis in European ancestry individuals identifies 517 loci associated  
1349 with liver enzymes. *Nat Commun* (**in press**)(2021).
- 1350 36. Stender, S. *et al.* Relationship between genetic variation at PPP1R3B and levels of liver glycogen  
1351 and triglyceride. *Hepatology* **67**, 2182-2195 (2018).
- 1352 37. Finucane, H.K. *et al.* Partitioning heritability by functional annotation using genome-wide  
1353 association summary statistics. *Nat Genet* **47**, 1228-35 (2015).
- 1354 38. Bulik-Sullivan, B.K. *et al.* LD Score regression distinguishes confounding from polygenicity in  
1355 genome-wide association studies. *Nat Genet* **47**, 291-5 (2015).
- 1356 39. Finucane, H.K. *et al.* Heritability enrichment of specifically expressed genes identifies disease-  
1357 relevant tissues and cell types. *Nat Genet* **50**, 621-629 (2018).
- 1358 40. Stephens, C.R. *et al.* The Impact of Education and Age on Metabolic Disorders. *Front Public*  
1359 *Health* **8**, 180 (2020).
- 1360 41. Wakefield, J. Bayes factors for genome-wide association studies: comparison with P-values.  
1361 *Genet Epidemiol* **33**, 79-86 (2009).
- 1362 42. Adzhubei, I., Jordan, D.M. & Sunyaev, S.R. Predicting functional effect of human missense  
1363 mutations using PolyPhen-2. *Curr Protoc Hum Genet* **Chapter 7**, Unit7 20 (2013).
- 1364 43. Ng, M.C. *et al.* Meta-analysis of genome-wide association studies in African Americans provides  
1365 insights into the genetic architecture of type 2 diabetes. *PLoS Genet* **10**, e1004517 (2014).

- 1366 44. Caliskan, M. *et al.* Genetic and Epigenetic Fine Mapping of Complex Trait Associated Loci in the  
1367 Human Liver. *Am J Hum Genet* **105**, 89-107 (2019).
- 1368 45. Baxter, M. *et al.* Phenotypic and functional analyses show stem cell-derived hepatocyte-like cells  
1369 better mimic fetal rather than adult hepatocytes. *J Hepatol* **62**, 581-9 (2015).
- 1370 46. Brancale, J. & Vilarinho, S. A single cell gene expression atlas of 28 human livers. *J Hepatol*  
1371 (2021).
- 1372 47. Goldstein, J.A. *et al.* LabWAS: novel findings and study design recommendations from a meta-  
1373 analysis of clinical labs in two independent biobanks. *medRxiv*, 2020.04.08.19011478 (2020).
- 1374 48. Sliz, E. *et al.* NAFLD risk alleles in PNPLA3, TM6SF2, GCKR and LYPLAL1 show divergent metabolic  
1375 effects. *Hum Mol Genet* **27**, 2214-2223 (2018).
- 1376 49. Sticova, E. & Jirsa, M. ABCB4 disease: Many faces of one gene deficiency. *Ann Hepatol* **19**, 126-  
1377 133 (2020).
- 1378 50. Gudbjartsson, D.F. *et al.* Large-scale whole-genome sequencing of the Icelandic population. *Nat*  
1379 *Genet* **47**, 435-44 (2015).
- 1380 51. Stattermayer, A.F., Halilbasic, E., Wrba, F., Ferenci, P. & Trauner, M. Variants in ABCB4 (MDR3)  
1381 across the spectrum of cholestatic liver diseases in adults. *J Hepatol* **73**, 651-663 (2020).
- 1382 52. Dwyer, A. *et al.* Influence of glycogen on liver density: computed tomography from a metabolic  
1383 perspective. *J Comput Assist Tomogr* **7**, 70-3 (1983).
- 1384 53. Mehta, M.B. *et al.* Hepatic protein phosphatase 1 regulatory subunit 3B (Ppp1r3b) promotes  
1385 hepatic glycogen synthesis and thereby regulates fasting energy homeostasis. *J Biol Chem* **292**,  
1386 10444-10454 (2017).
- 1387 54. Brouwers, M., Jacobs, C., Bast, A., Stehouwer, C.D.A. & Schaper, N.C. Modulation of Glucokinase  
1388 Regulatory Protein: A Double-Edged Sword? *Trends Mol Med* **21**, 583-594 (2015).
- 1389 55. Wang, L. *et al.* NADP modulates RNA m(6)A methylation and adipogenesis via enhancing FTO  
1390 activity. *Nat Chem Biol* **16**, 1394-1402 (2020).
- 1391 56. Wang, C.Y. *et al.* Loss of FTO in adipose tissue decreases Angptl4 translation and alters  
1392 triglyceride metabolism. *Sci Signal* **8**, ra127 (2015).
- 1393 57. Chen, Z. *et al.* Functional Screening of Candidate Causal Genes for Insulin Resistance in Human  
1394 Preadipocytes and Adipocytes. *Circ Res* **126**, 330-346 (2020).
- 1395 58. Nielsen, J.B. *et al.* Loss-of-function genomic variants highlight potential therapeutic targets for  
1396 cardiovascular disease. *Nat Commun* **11**, 6417 (2020).
- 1397 59. Fagerberg, L. *et al.* Analysis of the human tissue-specific expression by genome-wide integration  
1398 of transcriptomics and antibody-based proteomics. *Mol Cell Proteomics* **13**, 397-406 (2014).
- 1399 60. Duff, M.O. *et al.* Genome-wide identification of zero nucleotide recursive splicing in *Drosophila*.  
1400 *Nature* **521**, 376-9 (2015).
- 1401 61. Jamialahmadi, O. *et al.* Exome-Wide Association Study on Alanine Aminotransferase Identifies  
1402 Sequence Variants in the GPAM and APOE Associated With Fatty Liver Disease.  
1403 *Gastroenterology* **160**, 1634-1646 e7 (2021).
- 1404 62. Hammond, L.E. *et al.* Mitochondrial glycerol-3-phosphate acyltransferase-deficient mice have  
1405 reduced weight and liver triacylglycerol content and altered glycerolipid fatty acid composition.  
1406 *Mol Cell Biol* **22**, 8204-14 (2002).
- 1407 63. Cuchel, M. *et al.* Inhibition of microsomal triglyceride transfer protein in familial  
1408 hypercholesterolemia. *N Engl J Med* **356**, 148-56 (2007).
- 1409 64. Soubeyrand, S., Martinuk, A. & McPherson, R. TRIB1 is a positive regulator of hepatocyte nuclear  
1410 factor 4-alpha. *Sci Rep* **7**, 5574 (2017).
- 1411 65. Laudadio, I. *et al.* A feedback loop between the liver-enriched transcription factor network and  
1412 miR-122 controls hepatocyte differentiation. *Gastroenterology* **142**, 119-29 (2012).

- 1413 66. Kim, K. *et al.* RORalpha controls hepatic lipid homeostasis via negative regulation of  
1414 PPARgamma transcriptional network. *Nat Commun* **8**, 162 (2017).
- 1415 67. Kim, J.Y., Han, Y.H., Nam, M.W., Kim, H.J. & Lee, M.O. RORalpha suppresses interleukin-6-  
1416 mediated hepatic acute phase response. *Sci Rep* **9**, 11798 (2019).
- 1417 68. Laatsch, A. *et al.* Low density lipoprotein receptor-related protein 1 dependent endosomal  
1418 trapping and recycling of apolipoprotein E. *PLoS One* **7**, e29385 (2012).
- 1419 69. Moon, J.H. *et al.* Upregulation of hepatic LRP1 by rosiglitazone: a possible novel mechanism of  
1420 the beneficial effect of thiazolidinediones on atherogenic dyslipidemia. *J Mol Endocrinol* **49**, 165-  
1421 74 (2012).
- 1422 70. Skat-Rordam, J., Hojland Ipsen, D., Lykkesfeldt, J. & Tveden-Nyborg, P. A role of peroxisome  
1423 proliferator-activated receptor gamma in non-alcoholic fatty liver disease. *Basic Clin Pharmacol*  
1424 *Toxicol* **124**, 528-537 (2019).
- 1425 71. Sanyal, A.J. *et al.* Pioglitazone, vitamin E, or placebo for nonalcoholic steatohepatitis. *N Engl J*  
1426 *Med* **362**, 1675-85 (2010).
- 1427 72. Musso, G., Cassader, M., Paschetta, E. & Gambino, R. Thiazolidinediones and Advanced Liver  
1428 Fibrosis in Nonalcoholic Steatohepatitis: A Meta-analysis. *JAMA Intern Med* **177**, 633-640 (2017).
- 1429 73. Ratziu, V. *et al.* Rosiglitazone for nonalcoholic steatohepatitis: one-year results of the  
1430 randomized placebo-controlled Fatty Liver Improvement with Rosiglitazone Therapy (FLIRT)  
1431 Trial. *Gastroenterology* **135**, 100-10 (2008).
- 1432 74. Ratziu, V. *et al.* Long-term efficacy of rosiglitazone in nonalcoholic steatohepatitis: results of the  
1433 fatty liver improvement by rosiglitazone therapy (FLIRT 2) extension trial. *Hepatology* **51**, 445-53  
1434 (2010).
- 1435 75. Cusi, K. *et al.* Long-Term Pioglitazone Treatment for Patients With Nonalcoholic Steatohepatitis  
1436 and Prediabetes or Type 2 Diabetes Mellitus: A Randomized Trial. *Ann Intern Med* **165**, 305-15  
1437 (2016).
- 1438 76. Luc, G. *et al.* Distribution of apolipoprotein E between apo B- and non apo B-containing  
1439 lipoproteins according to apo E phenotype. *Atherosclerosis* **131**, 257-62 (1997).
- 1440 77. Nakaya, Y., Schaefer, E.J. & Brewer, H.B., Jr. Activation of human post heparin lipoprotein lipase  
1441 by apolipoprotein H (beta 2-glycoprotein I). *Biochem Biophys Res Commun* **95**, 1168-72 (1980).
- 1442 78. Lin, K.Y. *et al.* Evidence for inhibition of low density lipoprotein oxidation and cholesterol  
1443 accumulation by apolipoprotein H (beta2-glycoprotein I). *Life Sci* **69**, 707-19 (2001).
- 1444 79. Mabile, L. *et al.* Secreted apolipoprotein E reduces macrophage-mediated LDL oxidation in an  
1445 isoform-dependent way. *J Cell Biochem* **90**, 766-76 (2003).
- 1446 80. Karavia, E.A., Papachristou, D.J., Kotsikogianni, I., Giopanou, I. & Kypreos, K.E. Deficiency in  
1447 apolipoprotein E has a protective effect on diet-induced nonalcoholic fatty liver disease in mice.  
1448 *FEBS J* **278**, 3119-29 (2011).
- 1449 81. Schierwagen, R. *et al.* Seven weeks of Western diet in apolipoprotein-E-deficient mice induce  
1450 metabolic syndrome and non-alcoholic steatohepatitis with liver fibrosis. *Sci Rep* **5**, 12931  
1451 (2015).
- 1452 82. Tilg, H., Adolph, T.E. & Moschen, A.R. Multiple Parallel Hits Hypothesis in Nonalcoholic Fatty  
1453 Liver Disease: Revisited After a Decade. *Hepatology* **73**, 833-842 (2021).
- 1454 83. Hamada, M., Tsunakawa, Y., Jeon, H., Yadav, M.K. & Takahashi, S. Role of MafB in macrophages.  
1455 *Exp Anim* **69**, 1-10 (2020).
- 1456 84. Tran, M.T. *et al.* MafB deficiency accelerates the development of obesity in mice. *FEBS Open Bio*  
1457 **6**, 540-7 (2016).
- 1458 85. Hamada, M. *et al.* MafB promotes atherosclerosis by inhibiting foam-cell apoptosis. *Nat*  
1459 *Commun* **5**, 3147 (2014).

- 1460 86. Stoffel, W. *et al.* Obesity resistance and deregulation of lipogenesis in Delta6-fatty acid  
1461 desaturase (FADS2) deficiency. *EMBO Rep* **15**, 110-20 (2014).
- 1462 87. Ecker, J. *et al.* Induction of fatty acid synthesis is a key requirement for phagocytic  
1463 differentiation of human monocytes. *Proc Natl Acad Sci U S A* **107**, 7817-22 (2010).
- 1464 88. Mirea, A.M., Tack, C.J., Chavakis, T., Joosten, L.A.B. & Toonen, E.J.M. IL-1 Family Cytokine  
1465 Pathways Underlying NAFLD: Towards New Treatment Strategies. *Trends Mol Med* **24**, 458-471  
1466 (2018).
- 1467 89. Hotamisligil, G.S. Inflammation and metabolic disorders. *Nature* **444**, 860-7 (2006).
- 1468 90. Negrin, K.A. *et al.* IL-1 signaling in obesity-induced hepatic lipogenesis and steatosis. *PLoS One* **9**,  
1469 e107265 (2014).
- 1470 91. Osborn, O. & Olefsky, J.M. The cellular and signaling networks linking the immune system and  
1471 metabolism in disease. *Nat Med* **18**, 363-74 (2012).
- 1472 92. Tan, Q. *et al.* The Role of IL-1 Family Members and Kupffer Cells in Liver Regeneration. *Biomed*  
1473 *Res Int* **2016**, 6495793 (2016).
- 1474 93. Gieling, R.G., Wallace, K. & Han, Y.P. Interleukin-1 participates in the progression from liver  
1475 injury to fibrosis. *Am J Physiol Gastrointest Liver Physiol* **296**, G1324-31 (2009).
- 1476 94. Meier, R.P.H. *et al.* Interleukin-1 Receptor Antagonist Modulates Liver Inflammation and Fibrosis  
1477 in Mice in a Model-Dependent Manner. *Int J Mol Sci* **20**(2019).
- 1478 95. Gehrke, N. *et al.* Hepatocyte-specific deletion of IL1-RI attenuates liver injury by blocking IL-1  
1479 driven autoinflammation. *J Hepatol* **68**, 986-995 (2018).
- 1480 96. Larsen, C.M. *et al.* Interleukin-1-receptor antagonist in type 2 diabetes mellitus. *N Engl J Med*  
1481 **356**, 1517-26 (2007).
- 1482 97. van Asseldonk, E.J. *et al.* One week treatment with the IL-1 receptor antagonist anakinra leads  
1483 to a sustained improvement in insulin sensitivity in insulin resistant patients with type 1  
1484 diabetes mellitus. *Clin Immunol* **160**, 155-62 (2015).
- 1485 98. Banerjee, A. & Singh, J. Remodeling adipose tissue inflammasome for type 2 diabetes mellitus  
1486 treatment: Current perspective and translational strategies. *Bioeng Transl Med* **5**, e10150  
1487 (2020).
- 1488 99. Han, Y.H. *et al.* A maresin 1/RORalpha/12-lipoxygenase autoregulatory circuit prevents  
1489 inflammation and progression of nonalcoholic steatohepatitis. *J Clin Invest* **129**, 1684-1698  
1490 (2019).
- 1491 100. Chai, C. *et al.* Agonist of RORA Attenuates Nonalcoholic Fatty Liver Progression in Mice via Up-  
1492 regulation of MicroRNA 122. *Gastroenterology* **159**, 999-1014 e9 (2020).
- 1493 101. West, L.C. & Cresswell, P. Expanding roles for GILT in immunity. *Curr Opin Immunol* **25**, 103-8  
1494 (2013).
- 1495 102. Chiang, H.S. & Maric, M. Lysosomal thiol reductase negatively regulates autophagy by altering  
1496 glutathione synthesis and oxidation. *Free Radic Biol Med* **51**, 688-99 (2011).
- 1497 103. Chapoval, A.I. *et al.* B7-H3: a costimulatory molecule for T cell activation and IFN-gamma  
1498 production. *Nat Immunol* **2**, 269-74 (2001).
- 1499 104. Sun, T.W. *et al.* B7-H3 is expressed in human hepatocellular carcinoma and is associated with  
1500 tumor aggressiveness and postoperative recurrence. *Cancer Immunol Immunother* **61**, 2171-82  
1501 (2012).
- 1502 105. Kang, F.B. *et al.* B7-H3 promotes aggression and invasion of hepatocellular carcinoma by  
1503 targeting epithelial-to-mesenchymal transition via JAK2/STAT3/Slug signaling pathway. *Cancer*  
1504 *Cell Int* **15**, 45 (2015).
- 1505 106. Li, L. *et al.* Identification of key genes in nonalcoholic fatty liver disease progression based on  
1506 bioinformatics analysis. *Mol Med Rep* **17**, 7708-7720 (2018).

- 1507 107. Baeza-Raja, B. *et al.* Pharmacological inhibition of P2RX7 ameliorates liver injury by reducing  
1508 inflammation and fibrosis. *PLoS One* **15**, e0234038 (2020).
- 1509 108. Di Virgilio, F., Dal Ben, D., Sarti, A.C., Giuliani, A.L. & Falzoni, S. The P2X7 Receptor in Infection  
1510 and Inflammation. *Immunity* **47**, 15-31 (2017).
- 1511 109. Giuliani, A.L., Sarti, A.C., Falzoni, S. & Di Virgilio, F. The P2X7 Receptor-Interleukin-1 Liaison.  
1512 *Front Pharmacol* **8**, 123 (2017).
- 1513 110. Willebrords, J. *et al.* Protective effect of genetic deletion of pannexin1 in experimental mouse  
1514 models of acute and chronic liver disease. *Biochim Biophys Acta Mol Basis Dis* **1864**, 819-830  
1515 (2018).
- 1516 111. Cooreman, A. *et al.* Connexin and Pannexin (Hemi)Channels: Emerging Targets in the Treatment  
1517 of Liver Disease. *Hepatology* **69**, 1317-1323 (2019).
- 1518 112. Cai, B. *et al.* Macrophage MerTK Promotes Liver Fibrosis in Nonalcoholic Steatohepatitis. *Cell*  
1519 *Metab* **31**, 406-421 e7 (2020).
- 1520 113. Patin, E. *et al.* Genome-wide association study identifies variants associated with progression of  
1521 liver fibrosis from HCV infection. *Gastroenterology* **143**, 1244-1252 e12 (2012).
- 1522 114. Wen, Y. & Ju, C. MerTK - A Novel Potential Target to Treat NASH Fibrosis. *Hepatology* (2020).
- 1523 115. Hunter-Zinck, H. *et al.* Genotyping Array Design and Data Quality Control in the Million Veteran  
1524 Program. *Am J Hum Genet* **106**, 535-548 (2020).
- 1525 116. Kranzler, H.R. *et al.* Genome-wide association study of alcohol consumption and use disorder in  
1526 274,424 individuals from multiple populations. *Nat Commun* **10**, 1499 (2019).
- 1527 117. Justice, A.C. *et al.* AUDIT-C and ICD codes as phenotypes for harmful alcohol use: association  
1528 with ADH1B polymorphisms in two US populations. *Addiction* **113**, 2214-2224 (2018).
- 1529 118. Chang, C.C. *et al.* Second-generation PLINK: rising to the challenge of larger and richer datasets.  
1530 *Gigascience* **4**, 7 (2015).
- 1531 119. Willer, C.J., Li, Y. & Abecasis, G.R. METAL: fast and efficient meta-analysis of genomewide  
1532 association scans. *Bioinformatics* **26**, 2190-1 (2010).
- 1533 120. Hutchinson, A., Watson, H. & Wallace, C. Correcting the coverage of credible sets in Bayesian  
1534 genetic fine-mapping. *bioRxiv*, 781062 (2019).
- 1535 121. Haas, M.E. *et al.* Machine learning enables new insights into clinical significance of and genetic  
1536 contributions to liver fat accumulation. *medRxiv*, 2020.09.03.20187195 (2020).
- 1537 122. MacLean, M.T. *et al.* Linking abdominal imaging traits to electronic health record phenotypes.  
1538 *medRxiv*, 2020.09.08.20190330 (2020).
- 1539 123. Wattacheril, J. *et al.* Genome-Wide Associations Related to Hepatic Histology in Nonalcoholic  
1540 Fatty Liver Disease in Hispanic Boys. *J Pediatr* **190**, 100-107 e2 (2017).
- 1541 124. Patton, H.M. *et al.* Clinical correlates of histopathology in pediatric nonalcoholic steatohepatitis.  
1542 *Gastroenterology* **135**, 1961-1971 e2 (2008).
- 1543 125. Kleiner, D.E. *et al.* Design and validation of a histological scoring system for nonalcoholic fatty  
1544 liver disease. *Hepatology* **41**, 1313-21 (2005).
- 1545 126. Lin, H.J. *et al.* Home use of a compact, 12lead ECG recording system for newborns. *J*  
1546 *Electrocardiol* **53**, 89-94 (2019).
- 1547 127. Weinshilboum, R.M. & Wang, L. Pharmacogenomics: Precision Medicine and Drug Response.  
1548 *Mayo Clin Proc* **92**, 1711-1722 (2017).
- 1549 128. Gawrieh, S. *et al.* A Pilot Genome-Wide Analysis Study Identifies Loci Associated With Response  
1550 to Obeticholic Acid in Patients With NASH. *Hepatol Commun* **3**, 1571-1584 (2019).
- 1551 129. Simon, J.A. *et al.* Phenotypic predictors of response to simvastatin therapy among African-  
1552 Americans and Caucasians: the Cholesterol and Pharmacogenetics (CAP) Study. *Am J Cardiol* **97**,  
1553 843-50 (2006).

- 1554 130. Hardy, T. *et al.* The European NAFLD Registry: A real-world longitudinal cohort study of  
1555 nonalcoholic fatty liver disease. *Contemp Clin Trials* **98**, 106175 (2020).
- 1556 131. Dewey, F.E. *et al.* Distribution and clinical impact of functional variants in 50,726 whole-exome  
1557 sequences from the DiscovEHR study. *Science* **354**(2016).
- 1558 132. Harrison, S.A. *et al.* Selonsertib for patients with bridging fibrosis or compensated cirrhosis due  
1559 to NASH: Results from randomized phase III STELLAR trials. *J Hepatol* **73**, 26-39 (2020).
- 1560 133. Roden, D.M. *et al.* Development of a large-scale de-identified DNA biobank to enable  
1561 personalized medicine. *Clin Pharmacol Ther* **84**, 362-9 (2008).
- 1562 134. Bulik-Sullivan, B. *et al.* An atlas of genetic correlations across human diseases and traits. *Nat*  
1563 *Genet* **47**, 1236-41 (2015).
- 1564 135. Consortium, E.P. An integrated encyclopedia of DNA elements in the human genome. *Nature*  
1565 **489**, 57-74 (2012).
- 1566 136. Roadmap Epigenomics, C. *et al.* Integrative analysis of 111 reference human epigenomes.  
1567 *Nature* **518**, 317-30 (2015).
- 1568 137. Andersson, R. *et al.* An atlas of active enhancers across human cell types and tissues. *Nature*  
1569 **507**, 455-461 (2014).
- 1570 138. Fehrmann, R.S. *et al.* Gene expression analysis identifies global gene dosage sensitivity in cancer.  
1571 *Nat Genet* **47**, 115-25 (2015).
- 1572 139. Cahoy, J.D. *et al.* A transcriptome database for astrocytes, neurons, and oligodendrocytes: a new  
1573 resource for understanding brain development and function. *J Neurosci* **28**, 264-78 (2008).
- 1574 140. Heng, T.S., Painter, M.W. & Immunological Genome Project, C. The Immunological Genome  
1575 Project: networks of gene expression in immune cells. *Nat Immunol* **9**, 1091-4 (2008).
- 1576 141. Pers, T.H. *et al.* Biological interpretation of genome-wide association studies using predicted  
1577 gene functions. *Nat Commun* **6**, 5890 (2015).
- 1578 142. Schmidt, E.M. *et al.* GREGOR: evaluating global enrichment of trait-associated variants in  
1579 epigenomic features using a systematic, data-driven approach. *Bioinformatics* **31**, 2601-6 (2015).
- 1580 143. McLaren, W. *et al.* The Ensembl Variant Effect Predictor. *Genome Biol* **17**, 122 (2016).
- 1581 144. Genomes Project, C. *et al.* A global reference for human genetic variation. *Nature* **526**, 68-74  
1582 (2015).
- 1583 145. Chesi, A. *et al.* Genome-scale Capture C promoter interactions implicate effector genes at GWAS  
1584 loci for bone mineral density. *Nat Commun* **10**, 1260 (2019).
- 1585 146. Pashos, E.E. *et al.* Large, Diverse Population Cohorts of hiPSCs and Derived Hepatocyte-like Cells  
1586 Reveal Functional Genetic Variation at Blood Lipid-Associated Loci. *Cell Stem Cell* **20**, 558-570  
1587 e10 (2017).
- 1588 147. Wingett, S. *et al.* HiCUP: pipeline for mapping and processing Hi-C data. *F1000Res* **4**, 1310  
1589 (2015).
- 1590 148. Cairns, J. *et al.* CHiCAGO: robust detection of DNA looping interactions in Capture Hi-C data.  
1591 *Genome Biol* **17**, 127 (2016).
- 1592 149. Szklarczyk, D. *et al.* STRING v11: protein-protein association networks with increased coverage,  
1593 supporting functional discovery in genome-wide experimental datasets. *Nucleic Acids Res* **47**,  
1594 D607-D613 (2019).
- 1595 150. Gagliano Taliun, S.A. *et al.* Exploring and visualizing large-scale genetic associations by using  
1596 PheWeb. *Nat Genet* **52**, 550-552 (2020).
- 1597 151. Denny, J.C. *et al.* PheWAS: demonstrating the feasibility of a phenome-wide scan to discover  
1598 gene-disease associations. *Bioinformatics* **26**, 1205-10 (2010).
- 1599 152. Loh, P.R. *et al.* Reference-based phasing using the Haplotype Reference Consortium panel. *Nat*  
1600 *Genet* **48**, 1443-1448 (2016).

- 1601 153. Zhou, W. *et al.* Efficiently controlling for case-control imbalance and sample relatedness in large-  
1602 scale genetic association studies. *Nat Genet* **50**, 1335-1341 (2018).
- 1603 154. Elsworth, B. *et al.* The MRC IEU OpenGWAS data infrastructure. *bioRxiv*, 2020.08.10.244293  
1604 (2020).
- 1605 155. Shin, S.Y. *et al.* An atlas of genetic influences on human blood metabolites. *Nat Genet* **46**, 543-  
1606 550 (2014).
- 1607 156. Kettunen, J. *et al.* Genome-wide study for circulating metabolites identifies 62 loci and reveals  
1608 novel systemic effects of LPA. *Nat Commun* **7**, 11122 (2016).
- 1609 157. Hemani, G. *et al.* The MR-Base platform supports systematic causal inference across the human  
1610 phenome. *Elife* **7**(2018).
- 1611 158. Sun, B.B. *et al.* Genomic atlas of the human plasma proteome. *Nature* **558**, 73-79 (2018).
- 1612 159. Giambartolomei, C. *et al.* Bayesian test for colocalisation between pairs of genetic association  
1613 studies using summary statistics. *PLoS Genet* **10**, e1004383 (2014).
- 1614 160. Giri, A. *et al.* Trans-ethnic association study of blood pressure determinants in over 750,000  
1615 individuals. *Nat Genet* **51**, 51-62 (2019).
- 1616 161. Pulit, S.L. *et al.* Meta-analysis of genome-wide association studies for body fat distribution in  
1617 694 649 individuals of European ancestry. *Hum Mol Genet* **28**, 166-174 (2019).
- 1618 162. Teumer, A. *et al.* Genome-wide association meta-analyses and fine-mapping elucidate pathways  
1619 influencing albuminuria. *Nat Commun* **10**, 4130 (2019).
- 1620 163. Tin, A. *et al.* Target genes, variants, tissues and transcriptional pathways influencing human  
1621 serum urate levels. *Nat Genet* **51**, 1459-1474 (2019).
- 1622 164. Wuttke, M. *et al.* A catalog of genetic loci associated with kidney function from analyses of a  
1623 million individuals. *Nat Genet* **51**, 957-972 (2019).
- 1624 165. Astle, W.J. *et al.* The Allelic Landscape of Human Blood Cell Trait Variation and Links to Common  
1625 Complex Disease. *Cell* **167**, 1415-1429 e19 (2016).
- 1626 166. Guo, H. *et al.* Integration of disease association and eQTL data using a Bayesian colocalisation  
1627 approach highlights six candidate causal genes in immune-mediated diseases. *Hum Mol Genet*  
1628 **24**, 3305-13 (2015).
- 1629 167. Lambert, S.A. *et al.* The Human Transcription Factors. *Cell* **175**, 598-599 (2018).
- 1630 168. Garcia-Alonso, L., Holland, C.H., Ibrahim, M.M., Turei, D. & Saez-Rodriguez, J. Benchmark and  
1631 integration of resources for the estimation of human transcription factor activities. *Genome Res*  
1632 **29**, 1363-1375 (2019).
- 1633 169. Turei, D., Korcsmaros, T. & Saez-Rodriguez, J. OmniPath: guidelines and gateway for literature-  
1634 curated signaling pathway resources. *Nat Methods* **13**, 966-967 (2016).
- 1635 170. Ceccarelli, F., Turei, D., Gabor, A. & Saez-Rodriguez, J. Bringing data from curated pathway  
1636 resources to Cytoscape with OmniPath. *Bioinformatics* **36**, 2632-2633 (2020).
- 1637
